1 Coordinated downregulation of the photosynthetic apparatus as a protective mechanism  
2 against UV exposure in the diatom *Corethron hystrix*

3

4 Robert W. Read<sup>1</sup>, David C. Vuono<sup>1</sup>, Iva Neveux<sup>1</sup>, Carl Staub<sup>2</sup> and Joseph J. Grzymiski<sup>1</sup>

5

6 **1. Division of Earth and Ecosystem Sciences, Desert Research Institute, Reno, NV**

7 **89512, USA**

8 **2. Agtron, Inc. 9395 Double R Blvd, Reno, NV 89521, USA**

9

10 Correspondence: Joseph J. Grzymiski, Department of Earth and Ecosystem Sciences,

11 Desert Research Institute, 2215 Raggio Parkway, Reno, NV 89509, USA.

12 \*E-mail: [joeg@dri.edu](mailto:joeg@dri.edu)

13

14 **Abstract:**

15

16       The effect of ultraviolet radiation (UVR) on photosynthetic efficiency and the  
17 resulting mechanisms against UV exposure employed by phytoplankton are not  
18 completely understood. To address this knowledge gap, we developed a novel close-  
19 coupled, wavelength-configurable platform designed to produce precise and repeatable *in*  
20 *vitro* irradiation of *Corethron hystrix*, a member of a genera found abundantly in the  
21 Southern Ocean where UV exposure is high. We aimed to determine its metabolic,  
22 protective, mutative, and repair mechanisms as a function of varying levels of specific  
23 electromagnetic energy. Our results show that the physiological responses to each energy  
24 level of UV have a negative linear decrease in the photosynthetic efficiency of  
25 photosystem II proportional to UV intensity, corresponding to a large increase in the  
26 turnover time of quinone re-oxidation. Gene expression changes of photosystem II related  
27 reaction center proteins D1, CP43 and CP47 showed coordinated downregulation  
28 whereas the central metabolic pathway demonstrated mixed expression of up and  
29 downregulated transcripts after UVR exposure. These results suggest that while UVR  
30 may damage photosynthetic machinery, oxidative damage may limit production of new  
31 photosynthetic and electron transport complexes as a result of UVR exposure.

32

33 **Keywords:** Diatom, UVR, Photosynthetic damage, Transcriptome

34 **Introduction:**

35 Diatoms are microscopic photosynthetic algae that are ubiquitous throughout the  
36 surface waters of the oceans (Lohman 1960), account for roughly 40% of oceanic  
37 primary production, and one-fifth of the Earth's total primary production (Falkowski and  
38 Raven 2007). Diatoms also play a vital role in the global carbon cycle through their  
39 uptake of dissolved CO<sub>2</sub> and subsequent carbon fixation that forms the base of the marine  
40 food web (Armbrust 2009). Given their global distribution, diatoms have adapted to  
41 survive under a variety of environmental conditions (Ligowski et al. 2012; Verde and  
42 Prisco 2012; Marchetti et al. 2012). Unfavorable conditions such as nutrient limitation  
43 (Allen et al. 2008; Dyhrman et al. 2012; Shrestha et al. 2012; Bender et al. 2014), varying  
44 light levels (Domingues et al. 2012; Herbstová et al. 2015) and UV exposure (Wu et al.  
45 2015) are commonplace. The latter is of particular interest because of the damaging  
46 effects UV can have on photosynthesis as well as other metabolic pathways.

47 In phytoplankton, UV exposure can inhibit photosynthesis, based on the relative  
48 dose and dose rate (Cullen and Lesser 1991). An inhibition of the photosynthetic rate  
49 causes a decrease in the rate of primary production, with consequences in marine  
50 ecosystems as well as terrestrial environments. Phytoplankton can also produce  
51 protective compounds to combat the deleterious effects of UVR such as mycosporine-like  
52 amino acids (MAAs), DNA photolyases and many more undefined compounds (Helbling  
53 et al. 1996; Coesel et al. 2009). These compounds, when added to commercial products  
54 such as sunscreen (Berardesca et al. 2012; Emanuele et al. 2013), show promise in  
55 reducing carcinogenic effects of UV exposure in humans. Advances in this field require a  
56 reliable method to induce and measure damage in a controlled laboratory setting.

57 Fluorescence kinetics measurements are a reliable estimator of photosynthetic  
58 electron transport rates and photosystem II health (PSII) (Kolber and Falkowski 1993) in  
59 photoautotrophic organisms. Because PSII is a target of UVR induced damage (Tevini  
60 and Teramura 1989; Szilárd et al. 2007), Fast Repetition Rate Fluorometry (FRRF) has  
61 been used to examine variations in several photosynthetic parameters in relation to light  
62 impacts on the cell (Kolber et al. 1998). Changes in parameters such as the maximum  
63 quantum yield of PSII ( $F_v/F_m$ ) (Geider et al. 1993; Kolber and Falkowski 1993), the  
64 turnover time of electron transport from QA  $\rightarrow$  QB ( $\tau_1$ ) and QB  $\rightarrow$  PQ ( $\tau_2$ ) (Kolber et  
65 al. 1988), and the functional cross section of PSII ( $\sigma_{PSII}$ ) -- the effective target size of the  
66 PSII antenna in  $\text{\AA}^2$  (quanta) $^{-1}$  (Kolber et al. 1998), act as proxies to monitor electron  
67 transport rates and the relative health of PSII. Here we use them to monitor the rate and  
68 intensity of photosynthetic damage within the cell. Changes in these parameters are a  
69 function of the dose and dosage rate of absorbed radiation, as this has a direct impact of  
70 the oxidation state of PSII electron transport chain.

71 In this study, the diatom *C. hystrix* (CCMP 308) was subjected to increasing  
72 intensities of UVR energy ranging from 0.32 mW/cm<sup>2</sup> to 1.59 mW/cm<sup>2</sup> using a custom  
73 built UVR emitter array. This gave us the ability to precisely control and measure  
74 damage as a decrease in the photochemical efficiency of PSII using FRRF.  $F_v/F_m$ ,  
75  $\sigma_{PSII}$ , and  $\tau$  were monitored hourly or bihourly to measure the UV damage to  
76 PSII relative to non-irradiated conditions. Our aim was to test the UVR emitter array to  
77 identify break points in photochemical efficiency, as measured by FRRF, to better  
78 understand the physiological constraints of an ecologically important phytoplankton to  
79 UVR exposure. Furthermore, we aimed to characterize the transcriptomic profile of *C.*

80 *hystrix* under 0.64 mW/cm<sup>2</sup> UVR intensity to reveal transcriptional responses in the  
81 central metabolic pathway, photosynthetic electron transport chain (ETC), and DNA  
82 repair mechanisms. This study thereby provides a comprehensive investigation of the  
83 physiological and molecular stress response to UV irradiation using a UV emitter array  
84 designed specifically to dose planktonic phototroph cultures with any desired UVR  
85 intensity. These tools and methods, if shown to be successful, could be used to  
86 manipulate organisms to better understand how they protect themselves against DNA  
87 damage.

## 88 **Materials and Methods:**

### 89 *Cell Cultures*

90 *Corethron hystrix* CCMP 308 (Bigelow Laboratory for Ocean Sciences, East Boothbay,  
91 Maine, USA) was grown at a maintenance temperature of 14 °C under 12:12 L:D at an  
92 illumination of ~40 μmol photons m<sup>-2</sup> s<sup>-1</sup> using white LEDs. Although 14 °C was the  
93 recommended temperature for *in vitro* studies, *C. hystrix* has a much wider known  
94 temperature range. Duplicate cultures were grown in L1 medium (Guillard and Hargraves  
95 1993), prepared with 0.2 μm filtered surface seawater from the Gulf of Maine (Bigelow  
96 Laboratory for Ocean Sciences, East Boothbay, Maine, USA). Chlorophyll pigment was  
97 extracted in 90% acetone at -20 °C for 17 hours, in the dark. Following extraction,  
98 fluorescence of each sub-sample was measured using a 10AU Fluorometer (Turner  
99 Designs, Sunnyvale, CA, USA), and chlorophyll concentrations were calculated. Cell  
100 counts were determined using a Sedgewick chamber under bright light. Specific growth  
101 rates of culture replicates were estimated from the growth curves constructed from  
102 chlorophyll *a* fluorescence and cell counts obtained under non-irradiating conditions.

103 Growth rate (units of doublings per day) was calculated from log-normalized exponential  
104 growth phase. Growth curves were used to determine the mid-exponential phase when  
105 UVR irradiation would be performed. During the UVR experiments, chlorophyll *a*  
106 measurements and morphological cell counts were also collected bihourly in order to  
107 changes affected by UVR.

#### 108 *Photosynthetic Kinetics*

109 Fv/Fm, sigma, and tau measurements were monitored using a FRRF (Soliense, Inc,  
110 Shoreham, NY, USA). Cell cultures, in biological duplicate, were subjected to either  
111 bright white light only at  $\sim 40 \mu\text{mol m}^{-2} \text{sec}^{-1}$  (control condition) or a combination of  
112 bright white light ( $\sim 40 \mu\text{mol m}^{-2} \text{sec}^{-1}$ ) and UVR exposure ranging from  $0.32 \text{ mW/cm}^2$  to  
113  $1.59 \text{ mW/cm}^2$  (experimental condition). UVR was performed using an LED emitter  
114 platform (Lumenautix Inc., Reno, NV, USA; Supplementary Fig. S1). The overall  
115 experimental period consisted of both control and experimental conditions running for six  
116 hours, followed by a dark period of six hours for the two conditions.

#### 117 *NEST Configurable Emitter Array*

118 The NEST array is comprised of multiple discrete solid-state emitters operating in  
119 two modes, VIS and UV connected to a control unit (Supplemental Text). The output is  
120 regulated and temperature compensated for constant current DC – allowing for precise  
121 control and stability of light output. Visible LEDs are blue (3), red (3) and white (6) and  
122 the UV emitters (3). For this work only the UV and white LEDs were used. The white  
123 LED color temperature is 3985K and the output can vary between  $4$  and  $380 \mu\text{mol m}^{-2}$   
124  $\text{sec}^{-1}$ .

125 The LED array allows for the precise and repeatable incremental *in vitro* irradiation  
126 of target organisms to determine their protective, mutative, and repair properties as a  
127 function of varying levels of specific electromagnetic energy (Supplementary Fig. S1).  
128 The energy categories can be adjusted incrementally and independently to affect the  
129 organism's biological functions and to stress the organism to evoke specific physiological  
130 responses or cause DNA / RNA mutations.

131 Net UVR organism exposure was reported from the emitter array's gross output  
132 after subtracting attenuation from surface reflection, transmittance, absorption, and  
133 diffusion of the quartz glass container and seawater. This attenuation was approximately  
134 25% of the gross emitter output. Data were collected every hour for UVR energy  
135 intensities of 0.32 and 0.64 mW/cm<sup>2</sup> (measured at 285 nm, 12 nm FWHM). At higher  
136 doses of 0.96 – 1.59 mW/cm<sup>2</sup> (285 nm 12 nm FWHM), measurements were collected  
137 every 30 minutes. Raw data were processed and plotted using the ggplot2 package in the  
138 R environment (Wickham 2009). Rate constants for both Fv/Fm and sigma were  
139 calculated using a linear regression model also using R.

#### 140 *Illumina sequencing and Gene Expression analysis*

141 After photosynthetic kinetic measurements were made, total RNA was extracted  
142 immediately in duplicate from cells in the mid-exponential phase of growth directly after  
143 UVR exposure (0.64 mW/cm<sup>2</sup>, experimental and control cultures), as well as directly  
144 after a dark recovery period of six hours (experimental and control cultures), using the  
145 Ambion ToTALLY RNA kit (Life Technologies, Grand Island, NY, USA). The same  
146 experimental and control cultures in duplicate were used during both harvesting periods.  
147 These extractions produced approximately ~10-12 µg of total RNA from each pellet.

148 Samples were sent for sequencing at the Biodesign Institute at Arizona State University  
149 (Tempe, AZ, USA). Library preparation was fully automated and performed using the  
150 Apollo 324 liquid handling platform with selection for polyA RNA. Illumina HiSeq  
151 Sequencing yielded 2x100 bp paired-end reads.

152 Raw sequencing reads were uploaded to the sequencing read archive (NCBI  
153 accession: SRP091884, SRX2255404) and inspected using Fastqc (Andrews 2009) to  
154 determine quality, ambiguous read percentage and relative amount of sequence reads.  
155 Illumina RNA sequencing resulted in an average of 19.4 million raw reads per cDNA  
156 library with an average quality score of Q38 (Supplementary Table S1).

157 Raw Sequencing reads were trimmed using the sequence trimming program  
158 Trimmomatic with the following options: Remove any Illumina adapter, cut off the end  
159 of any read where the quality score falls below 10, use a sliding window of 5 to cut and  
160 trim any base where the average quality score falls below 32 for that window and only  
161 keep trimmed reads with a minimum length of 72. (Bolger et al. 2014). De-novo  
162 transcript assembly was performed using Velvet (Zerbino and Birney 2008). Optimal k-  
163 mer selection, as well as read coverage cutoff selection, was determined by the  
164 VelvetOptimiser (Gladman and Seemann 2012). Velvet-constructed contigs were  
165 assembled into full-length transcripts using the Oases transcriptome assembler, with a  
166 minimum transcript length of 150 base pairs (Schulz et al. 2012). Raw sequences were  
167 aligned to the assembled transcripts by Bowtie2 (Langmead and Salzberg 2012).

168 Abundances of mapped sequence reads were calculated using eXpress (Roberts and  
169 Pachter 2012), providing the estimated count of reads that mapped to each individual  
170 assembled transcript. Estimated counts from eXpress were normalized and counts were



171 calculated using DESeq2 (Love et al. 2014). Transcripts were considered differentially  
172 expressed if their associated  $\log_2$  fold changes were significant at (adjusted)  $p < 0.05$ ,  
173 based on the Wald test of DESeq2, while controlling for false discovery using the  
174 Benjamini-Hochberg Procedure (Love et al. 2014). Based on our experimental design,  
175 differential expression was compared between the UVR+white light irradiated cells  
176 (experimental treatment – in duplicate) and bright white light only cells (control  
177 treatment – in duplicate), directly after the six hour UVR exposure ended and also after a  
178 six-hour dark recovery period.

179 *C. hystrix* is not well annotated. In order to artificially reconstruct the pathways in  
180 *C. hystrix*, transcripts from our de-novo assembly were *in silico* translated and compared  
181 to Uniprot proteins using Hhblits, which is part of the HH-suite software package  
182 (Remmert et al. 2011; The UniProt Consortium 2017). Homologous protein homology  
183 was inferred from *in silico* translations using hidden Markov model alignments from  
184 Hhblits (Soding 2005). Translated transcripts were considered homologs if there was a  
185  $>90\%$  probability of the translated transcript being a homolog to a Uniprot protein.

186 Subsequent classification of homologous Uniprot proteins into functional  
187 annotation groups was performed by grouping Uniprot Ids based on gene ontology  
188 (Ashburner et al. 2000; The Gene Ontology Consortium 2017). In the case of  
189 supplemental photosynthetic electron transport, gene ontology provided a poor  
190 representation of the selected pathway. For this pathway, homologous proteins from the  
191 model centric diatom *Thalassiosira pseudonana* were combined with the Uniprot  
192 annotations, with the understanding that this organism's annotations may have changed  
193 since they were first annotated and uploaded to public databases in 2004 (Armbrust et al.

194 2004). The entire annotated *Thalassiosira pseudonana* photosynthetic electron transport  
195 pathway was downloaded from the Kyoto Encyclopedia of Genes and Genomes (KEGG)  
196 (Kanehisa and Goto 2000; Kanehisa et al. 2013).

197 Translated transcripts mapping to a homolog were sometimes one of several  
198 contigs. To maintain consistent mapping between homologs, transcript contigs were  
199 binned by functional annotation after translation. Additionally, in most cases, up and  
200 downregulation variation between contigs was small, making expression patterns more  
201 evident. However, on occasion, transcripts for the same functional annotation but  
202 different loci were both up and downregulated. Because *C. hystrix* does not have an  
203 annotated genome, binning by functional annotation produces an expression overview for  
204 the homolog, which accounts for transcriptional variability. Binned isoforms were  
205 visualized with a box and whisker plot using the ggplot2 package (Wickham 2009). The  
206 line in the box represents the median  $\log_2$  fold change when combining all the isoforms.  
207 The hinges are the 1<sup>st</sup> and 3<sup>rd</sup> quartile.

208

## 209 **Results:**

### 210 *Chlorophyll A and Cell Counts under laboratory conditions*

211 *C. hystrix* grew at rate of 0.37 doublings per day based on chlorophyll *a*  
212 concentration (linear regression equation  $y=5.74 + 0.254x$ ,  $r^2=0.991$ ) (Supplementary  
213 Fig. S2a); this was consistent with microscopic cell counts, which produced a growth rate  
214 of 0.392 doublings per day (linear regression equation  $y=9.70+0.272x$ ,  $r^2 = 0.990$ )  
215 (Supplementary Fig. S2b). Under UV light of different intensities, chlorophyll *a* content  
216 remained relatively constant during the six-hour irradiation period (Supplementary Fig.

217 S3). Additionally, there was no significant increase in cell growth over the irradiation  
218 period. However, light microscopy revealed morphologically altered cells in the UVR  
219 exposed cultures compared to control cultures. The percentage of morphologically intact  
220 cells was mostly constant for the lower UVR intensity levels ( $0.32 - 0.64 \text{ mW/cm}^2$ ), with  
221 a small decrease during the last two hours at  $0.64 \text{ mW/cm}^2$  (Fig. 1). However, higher  
222 intensities ( $0.96 - 1.59 \text{ mW/cm}^2$ ) caused a pronounced decrease in the amount of  
223 morphologically intact cells, especially during the last two hours of UVR exposure (Fig.  
224 1).

## 225 *Photosystem II*

226 To monitor the changes in PSII during exposure to UVR, photosynthetic kinetic  
227 measurements were recorded for *C. hystrix* using FRRF (Fig. 2). Several photosynthetic  
228 parameters were derived from FRRF measurements. First,  $F_v/F_m$  empirically represents  
229 the maximum quantum yield of PSII (Fig. 2A) (Geider et al. 1993; Kolber and Falkowski  
230 1993).  $F_v/F_m$  is a dimensionless parameter representing how efficiently absorbed  
231 photons are used for electron flow: a value of 1 represents complete absorbance  
232 efficiency and 0 represents no absorbance (Suggett et al. 2009). A second parameter,  
233 sigma is a proxy for the product of the optical cross section for PSII (roughly  
234 proportional to the number of chlorophyll molecules per PSII), the efficiency of  
235 excitation transfer from the antenna to the PSII reaction center and the quantum yield of  
236 charge separation (Fig. 2B) (Mauzerall 1986; Oxborough et al. 2012).

237  $F_v/F_m$  decreased linearly (Supplementary Table S2) with the rate of decay  
238 increasing with intensity (Supplementary Fig. S4-S8, Supplementary Tables S3-S7).  
239 Conversely, sigma increased linearly with increasing intensity, demonstrating an inverse

240 relationship between sigma and Fv/Fm for all doses of UVR in this study, with sigma  
241 increasing and Fv/Fm decreasing as damage accumulated (Fig. 2 AB, Supplementary Fig.  
242 S4-S8). At the higher UVR intensities there was a notable decrease in sigma as  
243 photosynthesis became inhibited (Supplementary Table S2). Overall, UVR had a  
244 powerful effect on the fluorescence kinetics of PSII, especially at the higher UVR  
245 intensities (0.96 – 1.59 mW/cm<sup>2</sup>) (Fig. 2, Supplementary Tables S5-S7). For example,  
246 sigma increased only 15% from the start of the UVR exposure until the end for the lowest  
247 UVR intensity of 0.32 mW/cm<sup>2</sup>, with the largest increase evident after three hours under  
248 irradiation (Supplementary Fig. S4, Supplementary Table S3). In comparison, at 0.96  
249 mW/cm<sup>2</sup>, we observed a similar 15% increase in sigma within the first two hours of the  
250 start UVR exposure, with a total increase in sigma of approximately 56% over the  
251 irradiation period (Supplementary Fig. S6, Supplementary Table S5). Furthermore, UVR  
252 intensities of 0.96 mW/cm<sup>2</sup> and 1.28 mW/cm<sup>2</sup> had very strong and similar responses. The  
253 rate of change of sigma for each of these two treatments was almost identical and  
254 approximately 44% faster than the rate of change observed at 0.64 mW/cm<sup>2</sup>  
255 (Supplementary Table S2) and 72% faster than the rate observed at 0.32 mW/cm<sup>2</sup>. At the  
256 highest intensity of 1.59 mW/cm<sup>2</sup>, the rate of change for sigma was slower than the rate at  
257 0.96 mW/cm<sup>2</sup> and 1.28 mW/cm<sup>2</sup>, likely because of extreme damage to the photosynthetic  
258 reaction centers.

259 We used RNA-seq to evaluate the expression response of *C. hystrix* PSII  
260 transcripts for a single UVR intensity (0.64 mW/cm<sup>2</sup>). This intensity was chosen because  
261 the majority of cells remained morphologically intact throughout the six-hour irradiation  
262 period (Fig. 1). There were 12 differentially expressed PSII related transcripts detected

263 directly after UVR exposure (Fig. 3, Supplementary Fig. S9). All 12 transcripts were  
264 downregulated and demonstrated little variation in their fold changes, indicating a strong  
265 and coordinated transcriptional response (Fig. 3, Supplementary Fig. S9, Supplementary  
266 Table S8). Specific transcripts, related to proteins such as the reaction center core D1 and  
267 D2 proteins were significantly downregulated (adjusted  $p < 0.001$ ; Supplementary Table  
268 S8), corresponding with observed decreases in the photosynthetic efficiency. Moreover,  
269 translated transcripts mapping to cytochrome c550, cytochrome b559 and PSII PsbH  
270 proteins were also strongly downregulated.

### 271 *Reoxidation of the Electron Acceptors*

272       There was very little change in tau 1 during the first 2.5 hours for any dose of  
273 UVR (Fig. 2C). After 2.5 hours, turnover time began to increase for the larger UVR  
274 doses: 0.96, 1.28, and 1.59 mW/cm<sup>2</sup> (Fig. 2). Overall, tau 1 turnover time increased from  
275 26.61 μs at 0.32 mW/cm<sup>2</sup> to 1114.0 μs at 1.28 mW/cm<sup>2</sup> – an approximately 42x increase  
276 (Supplementary Table S9). At the highest UVR energy (1.59 mW/cm<sup>2</sup>), tau 1 turnover  
277 time initially followed the same trend as 1.28 mW/cm<sup>2</sup>. However, there was a significant  
278 decline in the turnover time after 5 hours (Fig. 2C, Supplementary Table S9), likely  
279 because of a severe inhibition in photosynthesis.

280       Tau 2 reacted similarly to tau 1 during UVR exposure, although turnover time for  
281 tau 2 was much longer, on the order of milliseconds instead of microseconds (Fig. 2D).  
282 For the first two hours of irradiation, there was no significant change in the turnover rate  
283 for tau 2 (Fig. 2D). After 2.5 hours, tau 2 increased with each successive increase in UVR  
284 energy, with the exception of 1.59 mW/cm<sup>2</sup>, which decreased after 5 hours, similar to the  
285 behavior of tau 1 for the same treatment (Fig. 2D, Supplementary Table S10).

286           Photosynthetic electron transport genes are not well annotated in the Uniprot  
287 database. Thus, proteins from the ubiquitous model centric diatom *T. pseudonana* were  
288 combined with available Uniprot proteins to test for electron transport protein homology,  
289 as the majority of the photosynthetic electron transport pathway is partially annotated by  
290 KEGG (Kanehisa and Goto 2000; Kanehisa et al. 2013). Comparative transcriptomics for  
291 the supplemental electron transport pathway of the Z scheme at 0.64 mW/cm<sup>2</sup> were  
292 similar to the observations of PSII gene expression. There were 10 transcripts related to  
293 supplemental electron transport, most of which are a subunit of the cytochrome b<sub>6</sub>f  
294 complex. Cytochrome f (*petA*), the largest subunit of the cytochrome b<sub>6</sub>f complex (Gray  
295 1992), was downregulated according to both our *T. pseudonana* custom database and  
296 Uniprot database. Differential expression analysis of the 10 transcripts show nine  
297 decreased in abundance and one increased, demonstrating a coordinated downregulation  
298 of the supplemental electron transport genes. These results are corroborated by the  
299 increases in tau 1 and tau 2 turnover times (0.64 mW/cm<sup>2</sup>).

### 300 *Photosystem I and RuBisCO*

301           Photosynthetic kinetic measurements for photosystem I (PSI) are not reported in  
302 this study because they are outside the resolution of the current FRRF machine. However,  
303 gene expression of PSI genes was analyzed for the 0.64 mW/cm<sup>2</sup> UVR treatment (Fig. 3).  
304 There were 16 PSI related transcripts; 15 transcripts decreased in abundance compared to  
305 non-irradiated samples after UVR exposure. Both *psaA* (Apoprotein A1) and *psaB*  
306 (Apoprotein A2), which bind through hydrophobic interactions to form the core complex  
307 of PSI (Falkowski and Raven 2007) were downregulated under UVR. Additionally, *psaD*  
308 (PSI subunit II) transcripts, which facilitate the docking of ferredoxin and are an essential

309 component of correct PSI function, were downregulated (Hou et al. 2017). Inorganic  
310 carbon fixation involves the ribulose-1,5-bisphosphate carboxylase/oxygenase enzyme  
311 (RuBisCO). Five transcripts that map to RuBisCO related proteins were downregulated  
312 compared to the non-irradiated samples.

### 313 *Light Harvesting Complex*

314 Light harvesting complexes are photosynthetic protein complexes that harvest  
315 light energy and channel it into the PSII and PSI reaction centers. In contrast to the  
316 downregulation of PSII and PSI proteins, several light harvesting complex transcripts  
317 were upregulated in response to UVR. There was a total of 39 transcripts that mapped to  
318 light harvesting related proteins (Fig. 3, Supplementary Table S8). Approximately 54%  
319 (21/39) of those transcripts were decreased in abundance compared to the non-irradiated  
320 samples, including the highly conserved PSII CP43 and CP47 proteins.

### 321 *Metabolic Pathway Expression*

322 Glycolytic regulation in plants is accomplished by three main proteins:  
323 hexokinase, phosphofructokinase and pyruvate kinase (Plaxton 1996). From the  
324 glycolysis pathway, there were 24 differentially expressed transcripts mapping to eight  
325 homologous Uniprot proteins. In general, glycolytic Uniprot homologous transcripts  
326 showed mixed expression. Three *in silico* translated transcripts mapping to homologous  
327 proteins phosphofructokinase, phosphoglycerate kinase and enolase decreased in  
328 abundance directly after UVR exposure. Five *in silico* transcripts mapping to homologous  
329 proteins aldolase, triosephosphate isomerase, G3P dehydrogenase, phosphoglycerate  
330 mutase, and pyruvate kinase increased in abundance directly after UVR exposure (Fig. 4,  
331 Supplementary Table S11). None of the transcripts in our data mapped to hexokinase

332 homologs based on the results from both HMM protein detection and BLASTX  
333 (Camacho et al. 2009).

334 In the tricarboxylic acid (TCA) cycle, we observed 14 differentially expressed *in*  
335 *silico* translated transcripts mapping to 5 homologous Uniprot proteins in the TCA cycle  
336 (Supplementary Table S12). The rate limiting step of the TCA cycle, isocitrate  
337 dehydrogenase, increased in abundance compared to non-irradiated cells, however the  
338 variability between individual transcript expression was very large (Fig. 5). Similar to the  
339 transcriptomic results observed in the glycolytic pathway, the overall expression of the  
340 TCA cycle was mixed with the same number of up and downregulated transcripts (Fig. 5,  
341 Supplementary Table S12).

#### 342 *DNA Repair*

343 There were 70 DNA repair transcripts that were differentially expressed after  
344 UVR radiation based on ontological mappings (Supplementary Table S13). Out of those  
345 transcripts, 64% (45/70) were decreased in abundance compared to the non-irradiated  
346 cells (Fig. 6). Transcripts that increased in abundance were related to recombinational  
347 DNA repair. Nine *in silico* translated transcripts mapped to *RecA* homologs (Fig. 6), all  
348 of which were increased in abundance, including a transcript with a log<sub>2</sub> fold change of  
349 8.04 (256-fold increase) – the largest increase in abundance from the DNA repair  
350 pathway over non-irradiated cells. There is also an upregulated transcript related to a  
351 photolyase homolog, an enzyme that plays a crucial role in UV-induced DNA repair.

#### 352 *Preliminary Recovery*

353 Following UVR exposure, we conducted a dark recovery period of 6 hours and  
354 measured the transcriptional response. In contrast to the results seen directly after UVR



355 exposure and cellular damage, transcripts in the auxiliary metabolic pathways greatly  
356 increased in abundance after dark recovery (Fig. 3-6, Supplementary Tables S14-S17).  
357 Approximately 90% of the translated transcripts that mapped to homologous glycolytic  
358 and TCA cycle pathway homologs increased their abundance, even after a short dark  
359 recovery period of 6 hours. Many transcripts produced  $\log_2$  fold changes greater than  
360 two, with several greater than  $\log_2$  of seven. Furthermore, we observed a notable increase  
361 in the amount of DNA repair proteins that were upregulated after dark recovery (Fig. 6).  
362 After UVR exposure, approximately 36% of the DNA repair transcripts were increased in  
363 abundance compared to the non-irradiated cells; however, after dark recovery that  
364 number increased to approximately 76% of the transcripts. It was also observed that  
365 transcripts that were increased in abundance directly after irradiation seemed to further  
366 increase their abundance after dark recovery.

### 367 **Discussion:**

368       Controlled laboratory studies describing the impact of UVR on phytoplankton  
369 have the potential to improve our understanding of photosynthetic damage and repair as  
370 well as general DNA damage and repair. To develop a controlled laboratory methodology  
371 for studying the impacts of UVR on photosynthetic and metabolic pathways, we  
372 developed a UV light emitter to deliver repeatable doses at a high resolution across a  
373 wide spectrum of intensities to monitor for break points in photochemical efficiency  
374 using FRRF. To test our emitter array, we selected a cosmopolitan open-ocean diatom, of  
375 which members of its genus are found in the Southern Ocean where seasonal UV  
376 intensity is high due to ozone depletion. For example, during the spring, pennate and  
377 centric diatoms comprise a large portion of the Southern Ocean biomass, and the genus

378 *Corethron* is one of the top four genera (Vincent 1988). We chose the diatom *C. hystrix*  
379 for our study.

### 380 *Growth Rate and Cell Morphology*

381 The growth rate for laboratory grown *C. hystrix* under normal photosynthetically  
382 active radiation (PAR,  $\sim 40 \mu\text{mol m}^{-2} \text{s}^{-1}$ ) conditions was similar to published values for  
383 several diatoms under analogous light levels (Gilstad and Sakshaug 1990). Higher level  
384 plants, which can maintain chlorophyll levels during UVR exposure, may have a higher  
385 tolerance to UVR stress as they are able to more efficiently transfer their excitation  
386 energy into PSII reaction center proteins (Bornman and Vogelmann 1991; Greenberg et  
387 al. 1997). Chloroplast morphology was indeed altered at UVR levels of 0.96-1.59  
388  $\text{mW/cm}^2$ , however the largest decrease in intact chloroplasts occurred mostly during the  
389 last two hours of irradiation as result of the cumulative UVR dose. Morphological  
390 alterations consisted of jagged chloroplasts that migrated toward the center of the cell,  
391 which could be a response similar to the “chloroplast clumping” phenomenon seen in  
392 other organisms as a form of UV protection (Sharon et al. 2011).

### 393 *Photosynthetic Kinetics and Gene Expression*

394 Photosystem II damage was affected by both UVR intensity and time during our  
395 study, with damage from the highest irradiation treatments ultimately resulting in a loss  
396 of photosynthetic function – Fv/Fm becomes approximately zero (Fig. 2A,  
397 Supplementary Fig. S4-S8). The observed decrease in Fv/Fm is likely caused by UVR  
398 directly damaging PSII reaction centers while also increasing *C. hystrix*'s susceptibility to  
399 photoinactivation (Rijstenbil 2002). We also observed a corresponding increase in sigma,  
400 the functional cross section of PSII which is proportional to the amount of number of

401 chlorophyll molecules per photosystem II reaction center. This increase may be an  
402 environmental adaption to the extreme conditions, where under these conditions,  
403 chlorophyll molecules may be transferring their excitation energy away from the  
404 damaged reaction centers and into the remaining functional reaction centers, thus  
405 increasing the amount of chlorophyll molecules servicing the functional centers and  
406 increasing the efficiency of energy transfer of those intact centers.

407 We observed that UVR intensity begins to have a significant effect on the  
408 photosynthetic efficiency and energy transfer by 3 hours at the UV intensity of 0.64  
409  $\text{mW}/\text{cm}^2$ . These results suggest that the time-dependent damage exceeded repair,  
410 provoking an increase in photoinactivation. Furthermore, higher UV intensities (1.28 and  
411  $1.59 \text{ mW}/\text{cm}^2$ ) accelerate photoinactivation much more rapidly, because more reaction  
412 centers are being irrevocably damaged. The observed decrease in sigma after 3-4 hours  
413 (Fig. 2B), for both 1.28 and  $1.59 \text{ mW}/\text{cm}^2$ , indicates that the majority of the reaction  
414 centers have been damaged or that chlorophyll can no longer funnel the excitation energy  
415 through the functional reaction centers (i.e., a loss of photosynthetic function). Thus, it is  
416 clear that photosystem operation is maintained at moderate UVR intensities ( $0.32\text{-}0.96$   
417  $\text{mW}/\text{cm}^2$ ) but the cell can only withstand irradiation for several hours before the  
418 photosystem is unable to absorb and transfer energy.

419 For various physiological processes, total dose as compared to dosage rate is  
420 important as some changes are the result of a cumulative UVR effect (Frohnmeier and  
421 Staiger 2003; Nawkar et al. 2013). Photosynthetic efficiency ( $F_v/F_m$ ) decreased twice as  
422 fast in cultures irradiated at  $1.59 \text{ mW}/\text{cm}^2$  than the culture irradiated at  $0.64 \text{ mW}/\text{cm}^2$ .  
423 Low  $F_v/F_m$  measurements represent a decrease in the efficiency of photosynthesis (i.e.,

424 dynamic photoinhibition), as seen in the coccolithophorid *Emiliana huxleyi* due to high  
425 photon flux densities (Critchley 2000; Ragni et al. 2008). Environmental stressors, such  
426 as high intensities of photosynthetically active radiation (PAR), adverse temperatures,  
427 and water limitation, typically cause photoinhibition. Our decreased Fv/Fm  
428 measurements after UVR exposure appear to mimic photoinhibition, which is possibly  
429 due to direct damage to PSII by UVR. However, future applications should determine  
430 whether molecular changes under a fast damage rate (high cumulative UV dose and rate)  
431 are the same as those changes under a more gradual damage rate (high cumulative UV  
432 dose but lower rate).

433       Photosystem II is known to be the most sensitive part of the photosynthetic  
434 system to UVR exposure, especially the oxygen evolving complex (Post et al. 1996;  
435 Szilárd et al. 2007). Our transcriptomic analysis shows that oxygen evolving complex  
436 genes, *psbO* (PSII manganese-stabilizing protein), *psbP* (PSII oxygen evolving enhancer  
437 protein) and *psbV* (cytochrome c-550), significantly decreased in abundance. *PsbP* has  
438 also been discovered to have a supplemental role in stabilizing the PSII-light harvesting  
439 super complexes, with decreasing levels of *psbP* producing a concurrent decrease in the  
440 amount of super complexes (Ifuku and Noguchi 2016). We observed that the majority of  
441 light harvesting complex transcripts decreased in abundance compared to the non-  
442 irradiated controls, especially the CP43 and CP47 related transcripts (Ifuku et al. 2011;  
443 Ifuku and Noguchi 2016). The CP47 chlorophyll apoprotein along with its sister protein  
444 CP43 are functionally used by the cell to channel the energy from the light harvesting  
445 complexes into the reaction center core, (Falkowski and Raven 2007). A previous study  
446 observed that both CP47 and CP43 protein expression levels decreased in the

447 cyanobacteria *Spirulina platensis* during UVR exposure (Rajagopal et al. 2000).  
448 Furthermore, the D1 reaction center protein and the aromatic tyrosine electron donors  
449 have been shown to be sensitive to UVR (Vass et al. 1996; Bouchard et al. 2006). D1 is  
450 one of two main reaction center proteins, while tyrosine amino acids are part of the donor  
451 side of PSII absorbing energy at 285 nm, thus making them a possible target for UVR  
452 irradiation (Vass et al. 1996). Transcriptome changes demonstrate that both the D1 and  
453 D2 reaction center proteins, encoded by *psbA* and *psbB* respectively, mapped to  
454 transcripts which decreased in abundance during UVR exposure compared to non-  
455 irradiated cells. It has been determined that the overall changes in the expression of *psbA*  
456 differ based on the specific organism (Surplus et al. 1998; Huang et al. 2002), however,  
457 the decrease in abundance of our *psbA* transcripts during UVR was similar to the changes  
458 produced by *Arabidopsis thaliana* (Surplus et al. 1998). Other PSII reaction center  
459 transcripts, such as those that mapped to the cytochrome b559 protein, also displayed  
460 large decreases in abundance after UVR exposure.

461 Intuitively, it would be assumed that if these subunits were being actively  
462 damaged there would be an increase in their individual gene expression to help mitigate  
463 and replace damaged protein subunits. UVR exposure, however, has many other cellular  
464 consequences including an increased amount oxidative stress within the cell (Rijstenbil  
465 2002). The Reactive Oxygen Species (ROS) produced during oxidative stress can have  
466 serious deleterious effects including photodamage to photosynthetic machinery, an  
467 imbalance in the photosynthetic redox signaling pathways and direct inhibition of D1  
468 synthesis, which is necessary for PSII repair (Gururani et al. 2015). The result of these  
469 effects is increased photosynthetic photoinhibition. After UVR irradiation, we observed

470 an upregulation of transcripts related to ATP-dependent Clp proteases and cysteine  
471 proteases, chloroplast specific enzymes which play a role in protein turnover, suggesting  
472 the cells may indeed be dealing with an increased amount of damaged proteins (Olinares  
473 et al. 2011). Additionally, ROS can also activate a signaling cascade, where receptors  
474 transmit signals to regulatory molecules which decrease nuclear gene expression of  
475 photosynthetic genes (Gururani et al. 2015). This likely explains why nearly complete  
476 downregulation of photosynthetic genes is observed for organisms subjected to UVR  
477 (Rijstenbil 2002; Gururani et al. 2015).

478         Tau is a proxy for the PSII reaction center turnover time (Kolber et al. 1988).  
479 Both tau 1 and tau 2 turnover times increase significantly at UVR intensities of 0.64-1.59  
480 mW/cm<sup>2</sup> (Fig. 2CD). This is because the plastoquinones QA and QB are directly  
481 susceptible to UVR damage (Melis et al. 1992). Our data also illustrate that turnover time  
482 corresponds to intensity (Fig. 2C-D, Supplementary Fig. S4-S8, Supplementary Tables  
483 S3-S7, S9 and S10). With turnover times increasing up to 0.14 seconds for tau 2 at 1.28  
484 mW/cm<sup>2</sup> (Fig. 2D), these long reoxidation times have a detrimental effect on  
485 photosynthesis as excess photon energy causes a buildup of oxidative radicals, thus  
486 explaining the genetic downregulation of photosynthetic genes and almost complete loss  
487 of photosynthetic function at higher intensities of UVR.

488         Previously it was observed that the redox state of QA may have an effect on the  
489 abundance of light harvesting complex transcript abundances (Maxwell et al. 1995). This  
490 phenomenon is perhaps another driving force behind the decrease in abundance in the  
491 majority of light harvesting complex transcripts. As the turnover time for QA increases  
492 during UVR exposure, the cell may reduce the abundance of certain light harvesting

493 proteins in order to prevent an increase in irradiance stress and higher photoinhibition.  
494 Simultaneously, the cell maybe trying to maintain the structural integrity of functional  
495 reaction centers (through an increase in chlorophyll binding protein), as a way of limiting  
496 damage. This type of competing self-regulation highlights the overall complexity of  
497 transcriptomic regulation during UVR exposure.

498 Transcriptome analysis of supplemental photosynthetic electron transport genes  
499 corresponds with our PSII expression analysis, as the majority of the transcripts were  
500 downregulated compared to the control samples. Most of the transcripts in this subset of  
501 data mapped to homologous cytochrome b6-f complex proteins. There are 4 major  
502 subunits that make up the cytochrome b6-f complex in algae (Pierre et al. 1995). We  
503 identified both of the heme-bearing subunits of the cytochrome b6-f complex, and they  
504 were strongly downregulated after UVR exposure. Thus, the cell extends its protective  
505 strategy to UVR exposure, using transcriptional downregulation, to complex III in the  
506 photosynthetic electron transport chain.

507 Photosystem I is not directly affected by UVR and is more resistant to  
508 environmental stressors such as high-light levels (Teramura and Ziska 1996; Zhang et al.  
509 2016). However, with an interaction between PSII and PSI due to the photosynthetic  
510 electron cascade, UVR exposure will unavoidably have a downstream impact on  
511 photosystem I. The transcriptional analysis provided some insight into the health of  
512 photosystem I. Of the 16 transcripts from photosystem I, 15 transcripts mapping to four  
513 Uniprot homologs, decreased in abundance during irradiation. The majority of the PSI  
514 transcripts map to *psaA* and *psaB* which code for PSI P700 chlorophyll *a* apoprotein A1  
515 and A2 respectively. *PsaB* binds hydrophobically to *psaA* to form the major reaction

516 center of PSI (Falkowski and Raven 2007). Additionally, the PSI subunit II (*psaD*)  
517 transcripts were also significantly downregulated. *PsaD* is an important protein that is  
518 crucial for the stability and correct assembly of PSI while also providing a ferredoxin  
519 binding site (Hou et al. 2017). The decreased abundance of *psaA*, *psaB*, and *psaD*  
520 transcripts indicates that like PSII and the  $b_6f$  complex, transcriptional downregulation  
521 was most likely influenced by PSII photoinhibition and oxidative stress, which means it  
522 could possibly act as a secondary protective strategy to prevent increased stress and  
523 photoinhibition.

524         The first stage of the photosynthetic dark reactions is the fixation of CO<sub>2</sub> into 3-  
525 phosphoglycerate, which is catalyzed by the protein RuBisCO. RuBisCO is the most  
526 abundant protein on Earth due to its crucial function combined with its inefficiency as a  
527 carboxylase (Raven 2009; Raven 2013). Our data demonstrated a coordinated  
528 downregulation for the transcripts mapping to the RuBisCO homologs, with all  
529 transcripts decreased in abundance compared to non-irradiated cells (Fig. 3). Previous  
530 research on higher order plants demonstrated that UVR exposure caused a large decrease  
531 in the activity and expression of RuBisCO when compared to control samples in pea  
532 leaves (Strid et al. 1990; Mackerness et al. 1999). Moreover, similar RuBisCO decreases  
533 were also observed in jackbean leaves (Choi and Roh 2003). This implies that the  
534 mechanism for gene expression decreases in RuBisCO expression ties directly back to the  
535 activity of the RuBisCO protein as well as through direct deactivation of its synthesis,  
536 similar to these previous studies (Choi and Roh 2003).

537 *Metabolic Pathway Expression*



538 UVR exposure is known to cause other metabolic gene expression changes in  
539 higher level plants (Jenkins 2009). The glycolytic cycle is the first phase in the  
540 catabolism of cellular carbohydrates (Nelson and Cox 2005). The TCA cycle, the second  
541 phase of catabolism, is an important source of the cellular reducing agent NADH, which  
542 helps generate the proton gradient that is critical for the production of ATP through  
543 electron transport (Nelson and Cox 2005). In our study, a coordinated downregulation of  
544 transcripts mapping to glycolysis and the TCA cycle was not observed, rather we  
545 observed a mixed gene expression pattern directly after UVR exposure (Fig. 4, 5),  
546 suggesting that certain enzymes may be shared between multiple pathways for other  
547 purposes. Logemann et al. 2000 found that UV-induction of select primary metabolism  
548 enzymes that can provide carbon substrates for the shikimate pathway, while Casati et al.  
549 2003 discovered that certain primary metabolism enzymes may be induced to provide  
550 energy in the form of ATP for the synthesis of molecules necessary for cell survival  
551 under UVB stress (Logemann et al. 2000; Casati and Walbot 2003).

#### 552 *DNA Repair*

553 Diatoms are subjected to high doses of UVR in their natural environment  
554 (Karentz et al. 1991; Fricke et al. 2011), and the selective pressure of managing UV  
555 damage may provide novel insights into mechanisms of DNA repair. Because DNA can  
556 directly absorb UVR, the damaged DNA forms cyclobutane pyrimidine dimers (CPDs) or  
557 pyrimidine 6-4 photoproducts (6-4PPs) (Sinha and Häder 2002). These photoproducts  
558 (i.e., lesions) can cause DNA to make an unnatural conformation, arresting replication  
559 (Rastogi et al. 2010). To minimize mutagenic effects, several organisms, including  
560 diatoms, produce photoreactivating proteins called photolyases which directly remove the

561 deleterious dimers (Coesel et al. 2009). Our data demonstrate that a single transcript  
562 mapped to a photolyase homolog, and it significantly increased in abundance directly  
563 after irradiation (Fig. 6). With its important role in DNA repair, future studies should  
564 identify the functional significance for this particular photolyase and how it affects the  
565 overall fitness of *C. hystrix* during UVR exposure.

566         Additionally, there are times where these photoproducts can lead to secondary  
567 DNA breaks, or UVR is so intense that double stranded breaks become one of the main  
568 photochemical end-products (De Mora et al. 2000). With the emergence of double-  
569 stranded breaks, the gene *recA* is recruited to initiate the cellular SOS response, which  
570 regulates between 50 and 66 genes involved in double stranded DNA (dsDNA) repair  
571 (Smith et al. 1987; Janion et al. 2002). *RecA* mediates homologous recombination repair,  
572 which will function to maintain the integrity of DNA. We observed all transcripts  
573 mapping to Uniprot *recA* homologs significantly increased in abundance relative to non-  
574 irradiated cells (Fig. 6), implicating the activity of these enzymes in dsDNA repair during  
575 our study. Furthermore, two site specific DNA-methyltransferase transcripts, which are  
576 known to induce the cellular SOS response, were also significantly increased in  
577 abundance directly after UVR exposure (Heitman and Model 1987) further highlighting  
578 the cells adaption to managing UVR exposure.

#### 579 *Preliminary Recovery*

580         After 6 hours of recovery in dark conditions, several photosynthetic light-  
581 harvesting transcripts increased in abundance compared to the non-irradiated samples,  
582 with some homologs demonstrating a reversal in expression (Fig. 3, Supplementary Table  
583 S14). These results suggest that the cell is possibly trying to repair certain aspects of its

584 UV damaged photosynthetic clusters in order to survive, as photodestruction can cause a  
585 complete loss of function for the complex (Lao and Glazer 1996). As the light harvesting  
586 complex provides the light energy for the photosystem reaction centers, it would be  
587 beneficial for the cell to repair the harvesting complex. Furthermore, homologous  
588 transcripts that were part of the cytochrome b6/f complex or maintained roles in  
589 photosynthetic electron transport also increased in abundance after night recovery. The  
590 largest change in abundance was by a *petF* transcript, which codes for the photosynthetic  
591 ferredoxin protein. This expression reversal may indicate that the cells are trying to  
592 restart and repair electron transport before PAR light returns to re-energize the  
593 photosynthetic system, or that ferredoxin may have a supplemental role in the defense  
594 against lingering oxidative stress similar to its response after other biotic attacks (Bilgin  
595 et al. 2010).

596         Moreover, despite the tremendous diversity of diatoms, with species estimates  
597 ranging from  $1 \times 10^4$  (Norton et al. 1996) to  $2 \times 10^5$  (Allen et al. 2006), few studies have  
598 focused on the potential biomedical applications of bioactive compounds produced by  
599 these organisms (Coesel et al. 2009; Prestegard et al. 2009). There were two polyketide  
600 synthetase transcripts which were significantly upregulated after dark recovery (Fig. 6).  
601 These enzymes are important in the biosynthesis of many natural products and could be  
602 involved in the production of compounds such as mycosporine-like amino acids (MAAs)  
603 (Klisch 2008).

604         Still, while there was an upregulation of some transcripts during the dark recovery  
605 period, many transcripts especially PSI and II transcripts, were still downregulated after  
606 dark recovery (Supplementary Table S14). These results suggest that while the cell is

607 actively trying to repair its photosystem, the damage may have been severe enough that  
608 recovery of the whole photosynthetic pathway was not possible during the six-hour  
609 recovery period (Neale et al. 1998; Fritz et al. 2008).

610 Our emitter array produced morphological, physiological and molecular responses  
611 with extremely high resolution and reproducibility. We demonstrate, based on *C. hystrix*  
612 physiological measurements, that our emitter array allowed us to directly manipulate the  
613 rate and intensity of photosynthetic damage based on the specific applied UVR energy  
614 intensities. We were also able to modulate metabolic gene expression changes. This  
615 ability to study specific physiological and molecular responses over a large spectrum of  
616 UVR intensities could provide further insights into UV induced damage in other complex  
617 organisms. Large-scale screening of organisms that are well adapted to high UV fluxes  
618 may contain novel mechanisms or natural compounds, such as photolyases or MAAs,  
619 which could increase our understanding of preventive mechanisms and possible  
620 treatments resulting from DNA damage.

621

## 622 **Acknowledgements**

623 We would like to thank Dr. Zbigniew Kolber for his expertise and guidance  
624 during the manuscript preparation.

625

## 626 **Compliance with Ethical Standards**

627 **Conflict of interest:** Authors Robert Read, David Vuono and Iva Neveux declare that  
628 they have no conflict of interest. Authors Joseph Grzyski and Carl Staub have a conflict

629 of interest as they are co-founders of the company, EMS Genomics, that developed the  
630 light engine.

631

632 **Ethical approval:** This article does not contain any studies with human participants or  
633 animals performed by any of the authors.

634 **References:**

- 635 Allen AE, Laroche J, Maheswari U, Lommer M, Schauer N, Lopez PJ, Finazzi G, Fernie  
636 AR, Bowler C (2008) Whole-cell response of the pennate diatom *Phaeodactylum*  
637 *tricornutum* to iron starvation. Proc Natl Acad Sci U S A 105:10438–10443. doi:  
638 10.1073/pnas.0711370105
- 639 Allen AE, Vardi A, Bowler C (2006) An ecological and evolutionary context for  
640 integrated nitrogen metabolism and related signaling pathways in marine diatoms.  
641 Curr Opin Plant Biol 9:264–273. doi: 10.1016/j.pbi.2006.03.013
- 642 Andrews S (2009) FastQC A Quality Control tool for High Throughput Sequence Data.  
643 <https://www.bioinformatics.babraham.ac.uk/projects/fastqc/>
- 644 Armbrust EV (2009) The life of diatoms in the world's oceans. Nature 459:185–92.
- 645 Armbrust EV, Berges JA, Bowler C, Green BR, Martinez D, Putnam NH, Zhou S, Allen  
646 AE, Apt KE, Bechner M, Brzezinski MA, Chaal BK, Chiovitti A, Davis AK,  
647 Demarest MS, Detter JC, Glavina T, Goodstein D, Hadi MZ, Hellsten U, Hildebrand  
648 M, Jenkins BD, Jurka J, Kapitonov VV, Kröger N, Lau WWY, Lane TW, Larimer  
649 FW, Lippmeier JC, Lucas S, Medina M, Montsant A, Obornik M, Parker MS,  
650 Palenik B, Pazour GJ, Richardson PM, Rynearson TA, Saito MA, Schwartz DC,  
651 Thamtrakoln K, Valentin K, Vardi A, Wilkerson FP, Rokhsar DS (2004) The  
652 genome of the diatom *Thalassiosira pseudonana*: ecology, evolution, and  
653 metabolism. Science 306:79–86. doi: 10.1126/science.1101156
- 654 Ashburner M, Ball CA, Blake JA, Botstein D, Butler H, Cherry JM, Davis AP, Dolinski  
655 K, Dwight SS, Eppig JT, Harris MA, Hill DP, Issel-Tarver L, Kasarskis A, Lewis S,  
656 Matese JC, Richardson JE, Ringwald M, Rubin GM, Sherlock G (2000) Gene  
657 Ontology: tool for the unification of biology. Nat Genet 25:25–29. doi:  
658 10.1038/75556
- 659 Bender SJ, Durkin CA, Berthiaume CT, Morales RL, Armbrust EV (2014)  
660 Transcriptional responses of three model diatoms to nitrate limitation of growth.  
661 Front Mar Sci 1:3. doi: 10.3389/fmars.2014.00003
- 662 Berardesca E, Bertona M, Altabas K, Altabas V, Emanuele E (2012) Reduced ultraviolet-  
663 induced DNA damage and apoptosis in human skin with topical application of a  
664 photolyase-containing DNA repair enzyme cream: clues to skin cancer prevention.  
665 Mol Med Rep 5:570–574. doi: 10.3892/mmr.2011.673
- 666 Bilgin DD, Zavala JA, Zhu J, Clough SJ, Ort DR, DeLucia EH (2010) Biotic stress  
667 globally downregulates photosynthesis genes. Plant Cell Environ 33:1597–1613. doi:  
668 10.1111/j.1365-3040.2010.02167.x
- 669 Bolger AM, Lohse M, Usadel B (2014) Trimmomatic: a flexible trimmer for Illumina  
670 sequence data. Bioinformatics 30:2114–2120. doi: 10.1093/bioinformatics/btu170

- 671 Bornman JF, Vogelmann TC (1991) Effect of UV-B Radiation on leaf optical properties  
672 measured with fibre optics. *J Exp Bot* 42:547–554.
- 673 Bouchard JN, Roy S, Campbell DA (2006) UVB effects on the photosystem II-D1  
674 protein of phytoplankton and natural phytoplankton communities. *Photochem*  
675 *Photobiol* 82:936–951. doi: 10.1562/2005-08-31-IR-666
- 676 Camacho C, Coulouris G, Avagyan V, Ma N, Papadopoulos J, Bealer K, Madden TL  
677 (2009) BLAST+: architecture and applications. *BMC Bioinformatics* 10:421–429.  
678 doi: 10.1186/1471-2105-10-421
- 679 Casati P, Walbot V (2003) Gene Expression Profiling in Response to Ultraviolet  
680 Radiation in Maize Genotypes with Varying Flavonoid Content. *Plant Physiol*  
681 132:1739–1754. doi: 10.1104/pp.103.022871
- 682 Choi BY, Roh KS (2003) UV-B Radiation Affects Chlorophyll and Activation of  
683 Rubisco by Rubisco Activase in *Canavalia ensiformis* L. Leaves. *J Plant Biol*  
684 46:117–121. doi: 10.1007/BF03030440
- 685 Coesel S, Mangogna M, Ishikawa T, Heijde M, Rogato A, Finazzi G, Todo T, Bowler C,  
686 Falciatore A (2009) Diatom PtCPF1 is a new cryptochrome/photolyase family  
687 member with DNA repair and transcription regulation activity. *EMBO Rep* 10:655–  
688 661. doi: 10.1038/embor.2009.59
- 689 Critchley C (2000) Photoinhibition. In: Raghavendra AS (ed) *Photosynthesis A*  
690 *Comprehensive Treatise*. Cambridge, UK, pp 264–272
- 691 Cullen JJ, Lesser MP (1991) Inhibition of photosynthesis by ultraviolet radiation as a  
692 function of dose and dosage rate: Results for a marine diatom. *Mar Biol* 111:183–  
693 190. doi: 10.1007/BF01319699
- 694 De Mora S, Demers S, Vernet M (2000) *The effects of UV radiation in the marine*  
695 *environment*. Cambridge University Press, Cambridge
- 696 Domingues N, Matos AR, Marques da Silva J, Cartaxana P (2012) Response of the  
697 diatom *Phaeodactylum tricorutum* to photooxidative stress resulting from high light  
698 exposure. *PLoS ONE* 7:e38162–6. doi: 10.1371/journal.pone.0038162
- 699 Dyhrman ST, Jenkins BD, Rynearson TA, Saito MA, Mercier ML, Alexander H,  
700 Whitney LP, Drzewianowski A, Bulygin VV, Bertrand EM, Wu Z, Benitez-Nelson  
701 C, Heithoff A (2012) The transcriptome and proteome of the diatom *Thalassiosira*  
702 *pseudonana* reveal a diverse phosphorus stress response. *PLoS ONE* 7:e33768. doi:  
703 10.1371/journal.pone.0033768
- 704 Emanuele E, Altabas V, Altabas K, Berardesca E (2013) Topical application of  
705 preparations containing DNA repair enzymes prevents ultraviolet-induced telomere  
706 shortening and c-FOS proto-oncogene hyperexpression in human skin: an  
707 experimental pilot study. *J Drugs Dermatol* 12:1017–1021.

- 708 Falkowski PG, Raven JA (2007) Aquatic Photosynthesis, 2nd edn. Princeton
- 709 Fricke A, Molis M, Wiencke C, Valdivia N, Chapman AS (2011) Effects of UV radiation  
710 on the structure of Arctic macrobenthic communities. *Polar Biol* 34:995–1009. doi:  
711 10.1007/s00300-011-0959-4
- 712 Fritz JJ, Neale PJ, Davis RF, Peloquin JA (2008) Response of Antarctic phytoplankton to  
713 solar UVR exposure: inhibition and recovery of photosynthesis in coastal and pelagic  
714 assemblages. *Mar Ecol Prog Ser* 365:1–16. doi: 10.3354/meps07610
- 715 Frohnmeier H, Staiger D (2003) Ultraviolet-B radiation-mediated responses in plants.  
716 Balancing damage and protection. *Plant Physiol* 133:1420–1428. doi:  
717 10.1104/pp.103.030049
- 718 Geider RJ, Greene RM, Kolber Z, MacIntyre HL, Falkowski PG (1993) Fluorescence  
719 assessment of the maximum quantum efficiency of photosynthesis in the western  
720 North Atlantic. *Deep-Sea Res Pt I* 40:1205–1224. doi: 10.1016/0967-0637(93)90134-  
721 o
- 722 Gilstad M, Sakshaug E (1990) Growth rates of ten diatom species from the Barents Sea at  
723 different irradiances and day lengths. *Mar Ecol Prog Ser* 64:169–173. doi:  
724 10.3354/meps064169
- 725 Gladman S, Seemann T (2012) VelvetOptimiser: automate your Velvet assemblies.  
726 <https://github.com/tseemann/VelvetOptimiser>
- 727 Gray JC (1992) Cytochrome f: Structure, function and biosynthesis. *Photosynth Res*  
728 34:359–374. doi: 10.1007/BF00029811
- 729 Greenberg B, Wilson M, Huang X-D, Duxbury C, Gerhardt K, Gensemer R (1997) The  
730 effects of ultraviolet-B radiation on higher plants. In: *Plants for Environmental*  
731 *Studies*. CRC Press, pp 1–35
- 732 Guillard RRL, Hargraves PE (1993) *Stichochrysis immobilis* is a diatom, not a  
733 chrysophyte. *Phycologia* 32:234–236.
- 734 Gururani MA, Venkatesh J, Tran L-SP (2015) Regulation of Photosynthesis during  
735 Abiotic Stress-Induced Photoinhibition. *Molecular Plant* 8:1304–1320. doi:  
736 10.1016/j.molp.2015.05.005
- 737 Heitman J, Model P (1987) Site-specific methylases induce the SOS DNA repair  
738 response in *Escherichia coli*. *J Bacteriol* 169:3243–3250.
- 739 Helbling EW, Chalker BE, Dunlap WC, Holm-Hansen O, Villafañe VE (1996)  
740 Photoacclimation of antarctic marine diatoms to solar ultraviolet radiation. *J Exp Mar*  
741 *Bio Ecol* 204:85–101. doi: 10.1016/0022-0981(96)02591-9
- 742 Herbstová M, Bína D, Koník P, Gardian Z, Vácha F, Litvín R (2015) Molecular basis of



- 743 chromatic adaptation in pennate diatom *Phaeodactylum tricorutum*. BBA-  
744 Bioenergetics 1847:534–543. doi: 10.1016/j.bbabi.2015.02.016
- 745 Hou HJM, Najafpour MM, Moore GF, Allakhverdiev SI (eds) (2017) Photosynthesis:  
746 Structures, mechanisms, and applications. Springer International Publishing, Cham
- 747 Huang L, McCluskey MP, Ni H, LaRossa RA (2002) Global gene expression profiles of  
748 the cyanobacterium *Synechocystis* sp. strain PCC 6803 in response to irradiation with  
749 UV-B and white light. J Bacteriol 184:6845–6858. doi: 10.1128/JB.184.24.6845-  
750 6858.2002
- 751 Ifuku K, Ido K, Sato F (2011) Molecular functions of PsbP and PsbQ proteins in the  
752 photosystem II supercomplex. J Photochem Photobiol B: Biol 104:158–164. doi:  
753 10.1016/j.jphotobiol.2011.02.006
- 754 Ifuku K, Noguchi T (2016) Structural coupling of extrinsic proteins with the oxygen-  
755 evolving center in photosystem II. Front Plant Sci 7:121–11. doi:  
756 10.3389/fpls.2016.00084
- 757 Janion C, Sikora nee Wójcik A, Nowosielska A, Grzesiuk E (2002) Induction of the SOS  
758 response in starved *Escherichia coli*. Environ Mol Mutagen 40:129–133. doi:  
759 10.1002/em.10094
- 760 Jenkins GI (2009) Signal transduction in responses to UV-B radiation. Annu Rev Plant  
761 Biol 60:407–431. doi: 10.1146/annurev.arplant.59.032607.092953
- 762 Kanehisa M, Goto S (2000) KEGG: kyoto encyclopedia of genes and genomes. Nucleic  
763 Acids Res 28:27–30.
- 764 Kanehisa M, Goto S, Sato Y, Kawashima M, Furumichi M, Tanabe M (2013) Data,  
765 information, knowledge and principle: back to metabolism in KEGG. Nucleic Acids  
766 Res 42:D199–D205. doi: 10.1093/nar/gkt1076
- 767 Karentz D, Cleaver JE, Mitchell DL (1991) Cell survival characteristics and molecular  
768 responses of antarctic phytoplankton to ultraviolet-b radiation. J Phycol 27:326–341.  
769 doi: 10.1111/j.0022-3646.1991.00326.x
- 770 Klisch M (2008) Mycosporine-like amino acids and marine toxins - the common and the  
771 different. Mar Drugs 6:147–163. doi: 10.3390/md20080008
- 772 Kolber Z, Falkowski PG (1993) Use of active fluorescence to estimate phytoplankton  
773 photosynthesis in situ. Limnol Oceanogr 38:1646–1665. doi:  
774 10.4319/lo.1993.38.8.1646
- 775 Kolber Z, Zehr J, Falkowski P (1988) Effects of growth irradiance and nitrogen limitation  
776 on photosynthetic energy conversion in photosystem II. Plant Physiol 88:923–929.
- 777 Kolber ZS, Prášil O, Falkowski PG (1998) Measurements of variable chlorophyll

- 778 fluorescence using fast repetition rate techniques: defining methodology and  
779 experimental protocols. *BBA* 1367:88–106. doi: 10.1016/s0005-2728(98)00135-2
- 780 Langmead B, Salzberg SL (2012) Fast gapped-read alignment with Bowtie 2. *Nat*  
781 *Methods* 9:357–359. doi: 10.1038/nmeth.1923
- 782 Lao K, Glazer AN (1996) Ultraviolet-B photodestruction of a light-harvesting complex.  
783 *Proc Natl Acad Sci U S A* 93:5258–5263.
- 784 Ligowski R, Jordan RW, Assmy P (2012) Morphological adaptation of a planktonic  
785 diatom to growth in Antarctic sea ice. *Mar Biol* 159:817–827. doi: 10.1007/s00227-  
786 011-1857-6
- 787 Logemann E, Tavernaro A, Schulz W, Somssich IE, Hahlbrock K (2000) UV light  
788 selectively coinduces supply pathways from primary metabolism and flavonoid  
789 secondary product formation in parsley. *Proc Natl Acad Sci U S A* 97:1903–1907.
- 790 Lohman KE (1960) The ubiquitous diatom—a brief survey of the present state of  
791 knowledge. *Am J Sci A* 258:180–191.
- 792 Love MI, Huber W, Anders S (2014) Moderated estimation of fold change and dispersion  
793 for RNA-seq data with DESeq2. *Genome Biol* 15:550. doi: 10.1186/s13059-014-  
794 0550-8
- 795 Mackerness S, Jordan BR, Thomas B (1999) Reactive oxygen species in the regulation of  
796 photosynthetic genes by ultraviolet-B radiation (UV-B: 280–320 nm) in green and  
797 etiolated buds of pea (*Pisum sativum* L.). *J Photochem Photobiol B: Biol* 48:180–  
798 188. doi: 10.1016/s1011-1344(99)00024-x
- 799 Marchetti A, Schrueth DM, Durkin CA, Parker MS, Kodner RB, Berthiaume CT, Morales  
800 R, Allen AE, Armbrust EV (2012) Comparative metatranscriptomics identifies  
801 molecular bases for the physiological responses of phytoplankton to varying iron  
802 availability. *Proc Natl Acad Sci U S A* 109:E317–25. doi: 10.1073/pnas.1118408109
- 803 Mauzerall D (1986) The optical cross section and absolute size of a photosynthetic unit.  
804 *Photosynth Res* 10:163–170. doi: 10.1007/BF00118279
- 805 Maxwell DP, Laudenbach DE, Huner N (1995) Redox regulation of light-harvesting  
806 complex II and cab mRNA abundance in *Dunaliella salina*. *Plant Physiol* 109:787–  
807 795.
- 808 Melis A, Nemson JA, Harrison MA (1992) Damage to functional components and partial  
809 degradation of photosystem II reaction center proteins upon chloroplast exposure to  
810 ultraviolet-B radiation. *BBA-Bioenergetics* 1100:312–320. doi: 10.1016/0167-  
811 4838(92)90487-x
- 812 Nawkar G, Maibam P, Park J, Sahi V, Lee S, Kang C (2013) UV-Induced Cell Death in  
813 Plants. *IJMS* 14:1608–1628. doi: 10.3390/ijms14011608

- 814 Neale PJ, Cullen JJ, Davis RF (1998) Inhibition of marine photosynthesis by ultraviolet  
815 radiation: Variable sensitivity of phytoplankton in the Weddell-Scotia Confluence  
816 during the austral spring. *Limnol and Oceanogr* 43:433–448. doi:  
817 10.4319/lo.1998.43.3.0433
- 818 Nelson DL, Cox MM (2005) *Lehninger Principles of Biochemistry*, 4 edn. W. H.  
819 Freeman and Company
- 820 Norton TA, Melkonian M, Andersen RA (1996) Algal biodiversity. *Phycologia* 35:308–  
821 326. doi: 10.2216/i0031-8884-35-4-308.1
- 822 Olinares PDB, Kim J, van Wijk KJ (2011) The Clp protease system; a central component  
823 of the chloroplast protease network. *BBA-Bioenergetics* 1807:999–1011. doi:  
824 10.1016/j.bbabi.2010.12.003
- 825 Oxborough K, Moore CM, Suggett DJ, Lawson T, Chan HG, Geider RJ (2012) Direct  
826 estimation of functional PSII reaction center concentration and PSII electron flux on  
827 a volume basis: a new approach to the analysis of Fast Repetition Rate fluorometry  
828 (FRRf) data. *Limnol Oceanogr Met* 10:142–154. doi: 10.4319/lom.2012.10.142
- 829 Pierre Y, Breyton C, Kramer D, Popot JL (1995) Purification and characterization of the  
830 cytochrome b6 f complex from *Chlamydomonas reinhardtii*. *J Biol Chem*  
831 270:29342–29349.
- 832 Plaxton WC (1996) The organization and regulation of plant glycolysis. *Annu Rev Plant*  
833 *Physiol Plant Mol Biol* 47:185–214. doi: 10.1146/annurev.arplant.47.1.185
- 834 Post A, Lukins PB, Walker PJ, Larkum AW (1996) The effects of ultraviolet irradiation  
835 on P680<sup>+</sup> reduction in PS II core complexes measured for individual S-states and  
836 during repetitive cycling of the oxygen-evolving complex. *Photosynth Res* 49:21–27.  
837 doi: 10.1007/BF00029424
- 838 Prestegard SK, Oftedal L, Coyne RT, Nygaard G, Skjærven KH, Knutsen G, Døskeland  
839 SO, Herfindal L (2009) Marine benthic diatoms contain compounds able to induce  
840 leukemia cell death and modulate blood platelet Activity. *Mar Drugs* 7:605–623. doi:  
841 10.3390/md7040605
- 842 Ragni M, Airs RL, Leonardos N, Geider RJ (2008) Photoinhibition of PsII in *Emiliania*  
843 *Huxleyi* (Haptophyta) under high light stress: the roles of photoacclimation,  
844 photoprotection, and photorepair. *J Phycol* 44:670–683. doi: 10.1111/j.1529-  
845 8817.2008.00524.x
- 846 Rajagopal S, Murthy SD, Mohanty P (2000) Effect of ultraviolet-B radiation on intact  
847 cells of the cyanobacterium *Spirulina platensis*: characterization of the alterations in  
848 the thylakoid membranes. *J Photochem Photobiol B: Biol* 54:61–66. doi:  
849 10.1016/S1011-1344(99)00156-6
- 850 Rastogi RP, Richa, Kumar A, Tyagi MB, Sinha RP (2010) Molecular mechanisms of

- 851 ultraviolet radiation-induced DNA damage and repair. *J Nucleic Acids* 2010:592980–  
852 32. doi: 10.4061/2010/592980
- 853 Raven JA (2009) Contributions of anoxygenic and oxygenic phototrophy and  
854 chemolithotrophy to carbon and oxygen fluxes in aquatic environments. *Aquat*  
855 *Microb Ecol* 56:177–192. doi: 10.3354/ame01315
- 856 Raven JA (2013) Rubisco: still the most abundant protein of Earth? *New Phytol* 198:1–3.  
857 doi: 10.1111/nph.12197
- 858 Remmert M, Biegert A, Hauser A, Söding J (2011) HHblits: lightning-fast iterative  
859 protein sequence searching by HMM-HMM alignment. *Nat Methods* 9:173–175. doi:  
860 10.1038/nmeth.1818
- 861 Rijstenbil JW (2002) Assessment of oxidative stress in the planktonic diatom  
862 *Thalassiosira pseudonana* in response to UVA and UVB radiation. *J Plankton Res*  
863 24:1277–1288. doi: 10.1093/plankt/24.12.1277
- 864 Roberts A, Pachter L (2012) Streaming fragment assignment for real-time analysis of  
865 sequencing experiments. *Nat Methods* 10:71–73. doi: 10.1038/nmeth.2251
- 866 Schulz MH, Zerbino DR, Vingron M, Birney E (2012) Oases: robust de novo RNA-seq  
867 assembly across the dynamic range of expression levels. *Bioinformatics* 28:1086–  
868 1092. doi: 10.1093/bioinformatics/bts094
- 869 Sharon Y, Dishon G, Beer S (2011) The effects of UV radiation on chloroplast clumping  
870 and photosynthesis in the seagrass *Halophila stipulacea* grown under high-PAR  
871 conditions. *Mar Biol* 2011:1–6. doi: 10.1155/2011/483428
- 872 Shrestha RP, Tesson B, Norden-Krichmar T, Federowicz S, Hildebrand M, Allen AE  
873 (2012) Whole transcriptome analysis of the silicon response of the diatom  
874 *Thalassiosira pseudonana*. *BMC Genomics* 13:499. doi: 10.1186/1471-2164-13-499
- 875 Sinha RP, Häder D-P (2002) UV-induced DNA damage and repair: a review. *Photochem*  
876 *Photobiol Sci* 1:225–236. doi: 10.1039/b201230h
- 877 Smith KC, Wang TV, Sharma RC (1987) recA-dependent DNA repair in UV-irradiated  
878 *Escherichia coli*. *J Photochem Photobiol B: Biol* 1:1–11.
- 879 Soding J (2005) Protein homology detection by HMM-HMM comparison. *Bioinformatics*  
880 21:951–960. doi: 10.1093/bioinformatics/bti125
- 881 Strid Å, Chow WS, Anderson JM (1990) Effects of supplementary ultraviolet-B radiation  
882 on photosynthesis in *Pisum sativum*. *BBA* 1020:260–268. doi: 10.1016/0005-  
883 2728(90)90156-x
- 884 Suggett DJ, Moore CM, Hickman AE, Geider RJ (2009) Interpretation of fast repetition  
885 rate (FRR) fluorescence: signatures of phytoplankton community structure versus

- 886 physiological state. *Mar Ecol Prog Ser* 376:1–19. doi: 10.3354/meps07830
- 887 Surplus SL, Jordan BR, Murphy AM, Carr JP, Thomas B, Mackerness SAH (1998)  
888 Ultraviolet-B-induced responses in *Arabidopsis thaliana*: role of salicylic acid and  
889 reactive oxygen species in the regulation of transcripts encoding photosynthetic and  
890 acidic pathogenesis-related proteins. *Plant Cell Environ* 21:685–694. doi:  
891 10.1046/j.1365-3040.1998.00325.x
- 892 Szilárd A, Sass L, Deák Z, Vass I (2007) The sensitivity of Photosystem II to damage by  
893 UV-B radiation depends on the oxidation state of the water-splitting complex. *BBA*  
894 1767:876–882. doi: 10.1016/j.bbabi.2006.11.020
- 895 Teramura AH, Ziska LH (1996) Ultraviolet-B radiation and photosynthesis. In: Baker NR  
896 (ed) *Photosynthesis and the Environment*. Springer Netherlands, Dordrecht, pp 435–  
897 450
- 898 Tevini M, Teramura AH (1989) UV-B EFFECTS ON TERRESTRIAL PLANTS.  
899 *Photochem Photobiol* 50:479–487. doi: 10.1111/j.1751-1097.1989.tb05552.x
- 900 The UniProt Consortium (2017) UniProt: the universal protein knowledgebase. *Nucleic*  
901 *Acids Res* 45:D158–D169. doi: 10.1093/nar/gkw1099
- 902 The Gene Ontology Consortium (2017) Expansion of the Gene Ontology knowledgebase  
903 and resources. *Nucleic Acids Res* 45:D331–D338. doi: 10.1093/nar/gkw1108
- 904 Vass I, Sass L, Spetea C, Bakou A, Ghanotakis DF, Petrouleas V (1996) UV-B-induced  
905 inhibition of photosystem II electron transport studied by EPR and chlorophyll  
906 fluorescence. Impairment of donor and acceptor side components. *Biochemistry*  
907 35:8964–8973. doi: 10.1021/bi9530595
- 908 Verde C, Prisco GD (2012) *Adaptation and Evolution in Marine Environments, Volume*  
909 *2: The Impacts of Global Change on Biodiversity*. Springer, Berlin/Heidelberg
- 910 Vincent WF (1988) *Microbial ecosystems of Antarctica*. Cambridge University Press
- 911 Wickham H (2009) *ggplot2: elegant graphics for data analysis*. Springer New York
- 912 Wu Y, Li Z, Du W, Gao K (2015) Physiological response of marine centric diatoms to  
913 ultraviolet radiation, with special reference to cell size. *J Photochem Photobiol B:*  
914 *Biol* 153:1–6. doi: 10.1016/j.jphotobiol.2015.08.035
- 915 Zerbino DR, Birney E (2008) Velvet: Algorithms for de novo short read assembly using  
916 de Bruijn graphs. *Genome Res* 18:821–829. doi: 10.1101/gr.074492.107
- 917 Zhang Z-S, Jin L-Q, Li Y-T, Tikkanen M, Li Q-M, Ai X-Z, Gao H-Y (2016) Ultraviolet-  
918 B radiation (UV-B) relieves chilling-light-induced PSI photoinhibition and  
919 accelerates the recovery Of CO<sub>2</sub> assimilation in cucumber (*Cucumis sativus L.*)  
920 leaves. *Sci Rep* 1–10. doi: 10.1038/srep34455

921 **Figure Legends**

922 Figure 1: Morphologically intact cells during the 6 hour UVB irradiation period.

923 Morphologically intact cells were estimated by bright light microscopy over the 6-hour  
924 irradiation period. All counts were collected both the non-irradiated cells and cells under  
925 5 different intensities of UVB ( $0.32 \text{ mW/cm}^2 - 1.59 \text{ mW/cm}^2$ ). Intact cell counts were  
926 collected in triplicate every 2 hours with error bars representing the standard deviation  
927 between replicated counts.

928

929

930 Figure 2: **A:**  $F_v/F_m$  as a measure of the maximum quantum yield of PSII. **B:** Sigma as a  
931 proxy for functional cross section and effective target size of the PSII antenna in  $\text{\AA}^2$   
932  $(\text{quanta})^{-1}$ . **C:** Tau 1 turnover time. During every hour at  $0.32 \text{ mW/cm}^2$  and  $0.64$   
933  $\text{mW/cm}^2$ , and every half hour at  $0.96-1.59 \text{ mW/cm}^2$  the tau 1 turnover time was  
934 calculated using Fast Repetition Rate Fluorometry (FRRF). Irradiation time is on the x-  
935 axis with the turnover time in  $\mu\text{s}$  on the y-axis. **D:** Tau 2 turnover time. During every  
936 hour at  $0.32 \text{ mW/cm}^2$  and  $0.64 \text{ mW/cm}^2$ , and every half hour at  $0.96-1.59 \text{ mW/cm}^2$  the  
937 tau 2 turnover time was calculated using Fast Repetition Rate Fluorometry (FRRF).  
938 Irradiation time is on the x-axis with the turnover time in  $\mu\text{s}$  on the y-axis. Note the drop  
939 in turnover time at  $1.28$  and  $1.59 \text{ mW/cm}^2$ .

940

941 Figure 3: Metabolic pathway reconstruction of the photosynthetic electron transport  
942 chain. Uniprot names for each gene product correspond to heat map subplots in the order  
943 shown (left- to-right for condition (directly after UVR and after dark recovery) and top-  
944 to-bottom for each Uniprot name). Higher transcript abundance is represented in red



945 (upregulation), lower transcript abundance in blue (downregulation) and empty spots  
946 represent a Uniprot homolog wasn't differentially expressed during that condition.

947

948 Figure 4: Box and whisker plot for Uniprot glycolysis homologs. Log<sub>2</sub> fold changes  
949 directly after UVR irradiation are represented in the left figure – labeled “Day” – while  
950 log<sub>2</sub> fold changes after six-hour dark recovery – labeled “Night” – are represented in the  
951 figure to the right. The line within the box is the median of the log<sub>2</sub> fold changes for that  
952 specific homolog. The hinges are the 1<sup>st</sup> and 3<sup>rd</sup> quartile. The upper whisker starts from  
953 the hinge and ends at the highest value that is within 1.5 \* inter-quartile range of the  
954 hinge. The lower whisker extends from the hinge to the lowest value that is within 1.5 \*  
955 inter-quartile range. The x-axis is consistent between both figures, therefore some  
956 homologs (e.g. Glucose-6-phosphate isomerase – directly after UVR irradiation) will  
957 have missing data in their specific figure, as there were no differentially expressed *in*  
958 *silico* translated transcripts mapping to that homolog during that time.

959

960 Figure 5: Box and whisker plot for Uniprot TCA homologs. Log<sub>2</sub> fold changes directly  
961 after UVR irradiation are represented in the left figure – labeled “Day” – while log<sub>2</sub> fold  
962 changes after six-hour dark recovery – labeled “Night” – are represented in the figure to  
963 the right. The line within the box is the median of the log<sub>2</sub> fold changes for that specific  
964 homolog. The hinges are the 1<sup>st</sup> and 3<sup>rd</sup> quartile. The upper whisker starts from the hinge  
965 and ends at the highest value that is within 1.5 \* inter-quartile range of the hinge. The  
966 lower whisker extends from the hinge to the lowest value that is within 1.5 \* inter-  
967 quartile range. The x-axis is consistent between both figures, therefore some homologs

968 (e.g. Aconitase – directly after UVR irradiation) will have missing data in their specific  
969 figure, as there were no differentially expressed *in silico* translated transcripts mapping to  
970 that homolog during that time.

971

972 Figure 6: Box and whisker plot for Uniprot DNA repair homologs. Log<sub>2</sub> fold changes  
973 directly after UVR irradiation are represented in the left figure – labeled “Day” – while  
974 log<sub>2</sub> fold changes after six-hour dark recovery – labeled “Night” – are represented in the  
975 figure to the right. The line within the box is the median of the log<sub>2</sub> fold changes for that  
976 specific homolog. The hinges are the 1<sup>st</sup> and 3<sup>rd</sup> quartile. The upper whisker starts from  
977 the hinge and ends at the highest value that is within 1.5 \* inter-quartile range of the  
978 hinge. The lower whisker extends from the hinge to the lowest value that is within 1.5 \*  
979 inter-quartile range. The x-axis is consistent between both figures, therefore some  
980 homologs will have missing data in their specific figure, as there were no differentially  
981 expressed *in silico* translated transcripts mapping to that homolog during that time.



Control

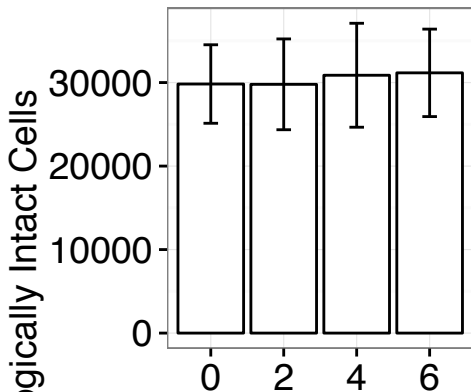0.32 mW/cm<sup>2</sup>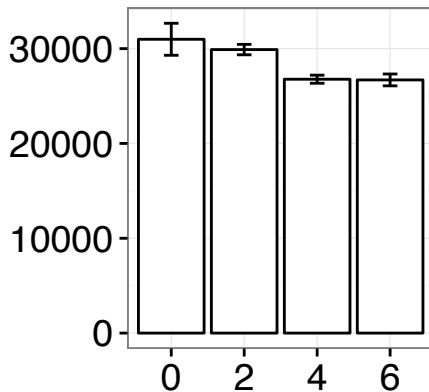0.64 mW/cm<sup>2</sup>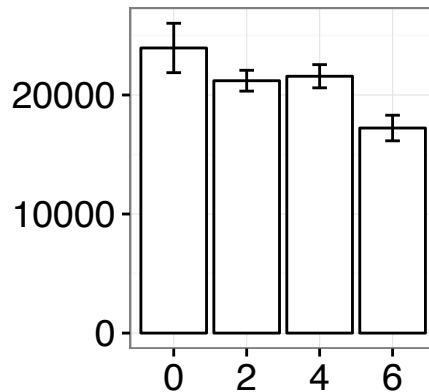0.96 mW/cm<sup>2</sup>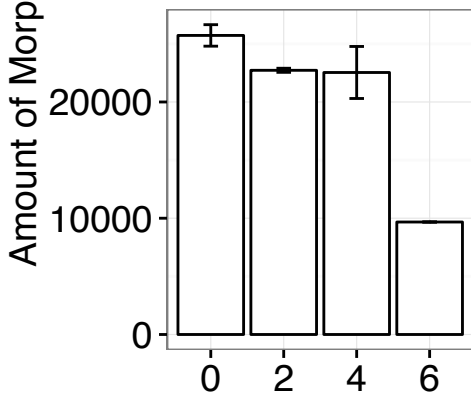1.28 mW/cm<sup>2</sup>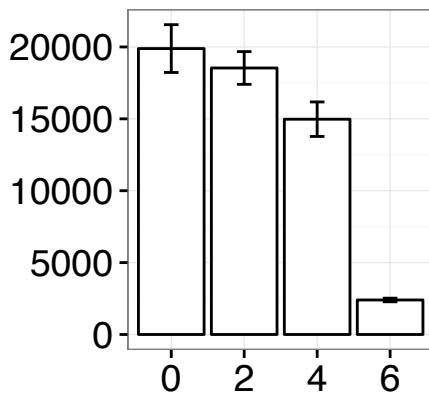1.59 mW/cm<sup>2</sup>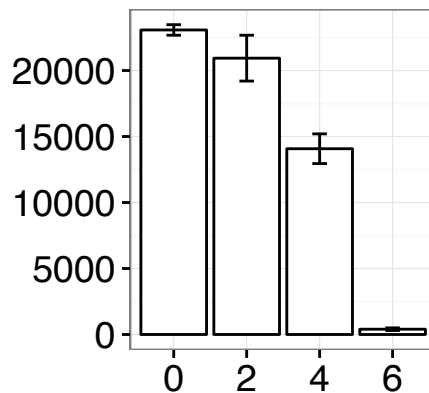

Time (hrs)

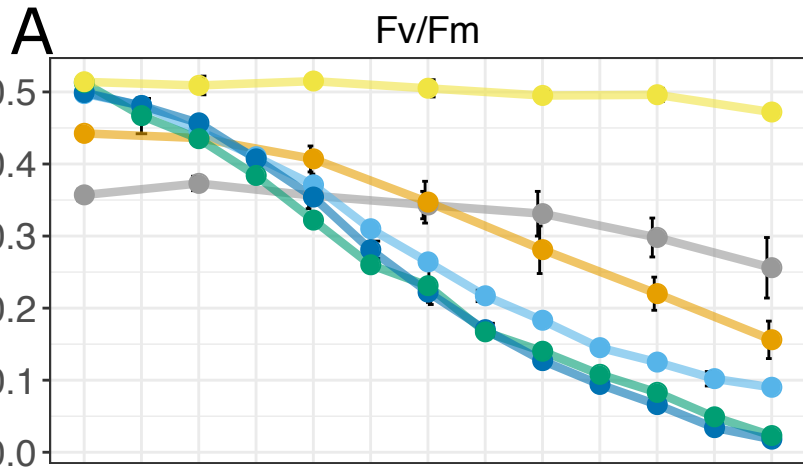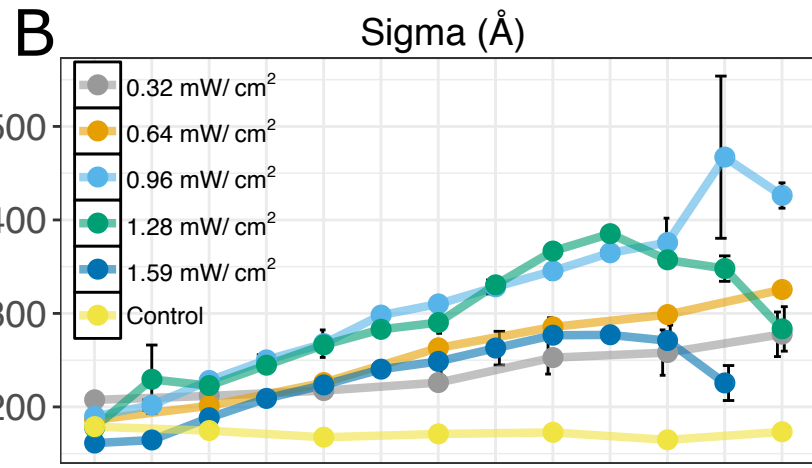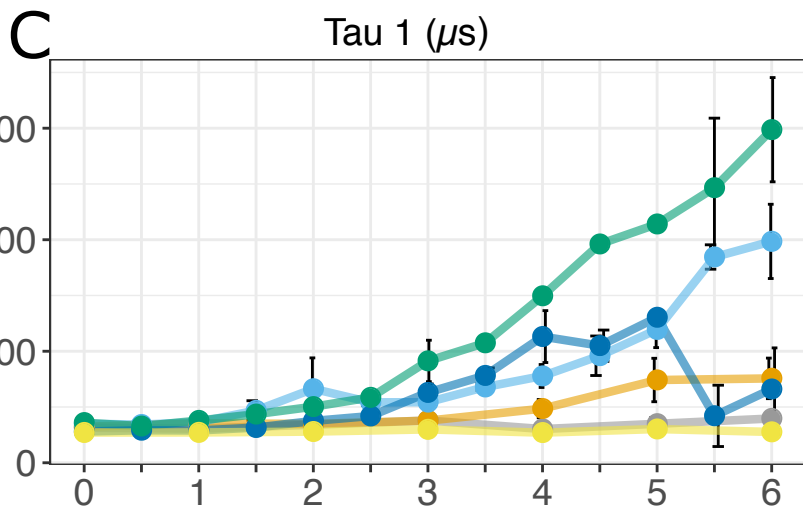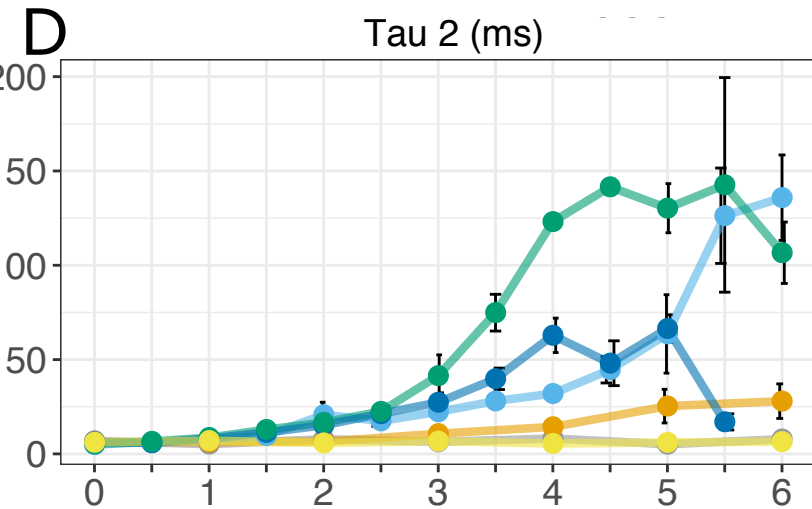

Irradiation Length (hrs)

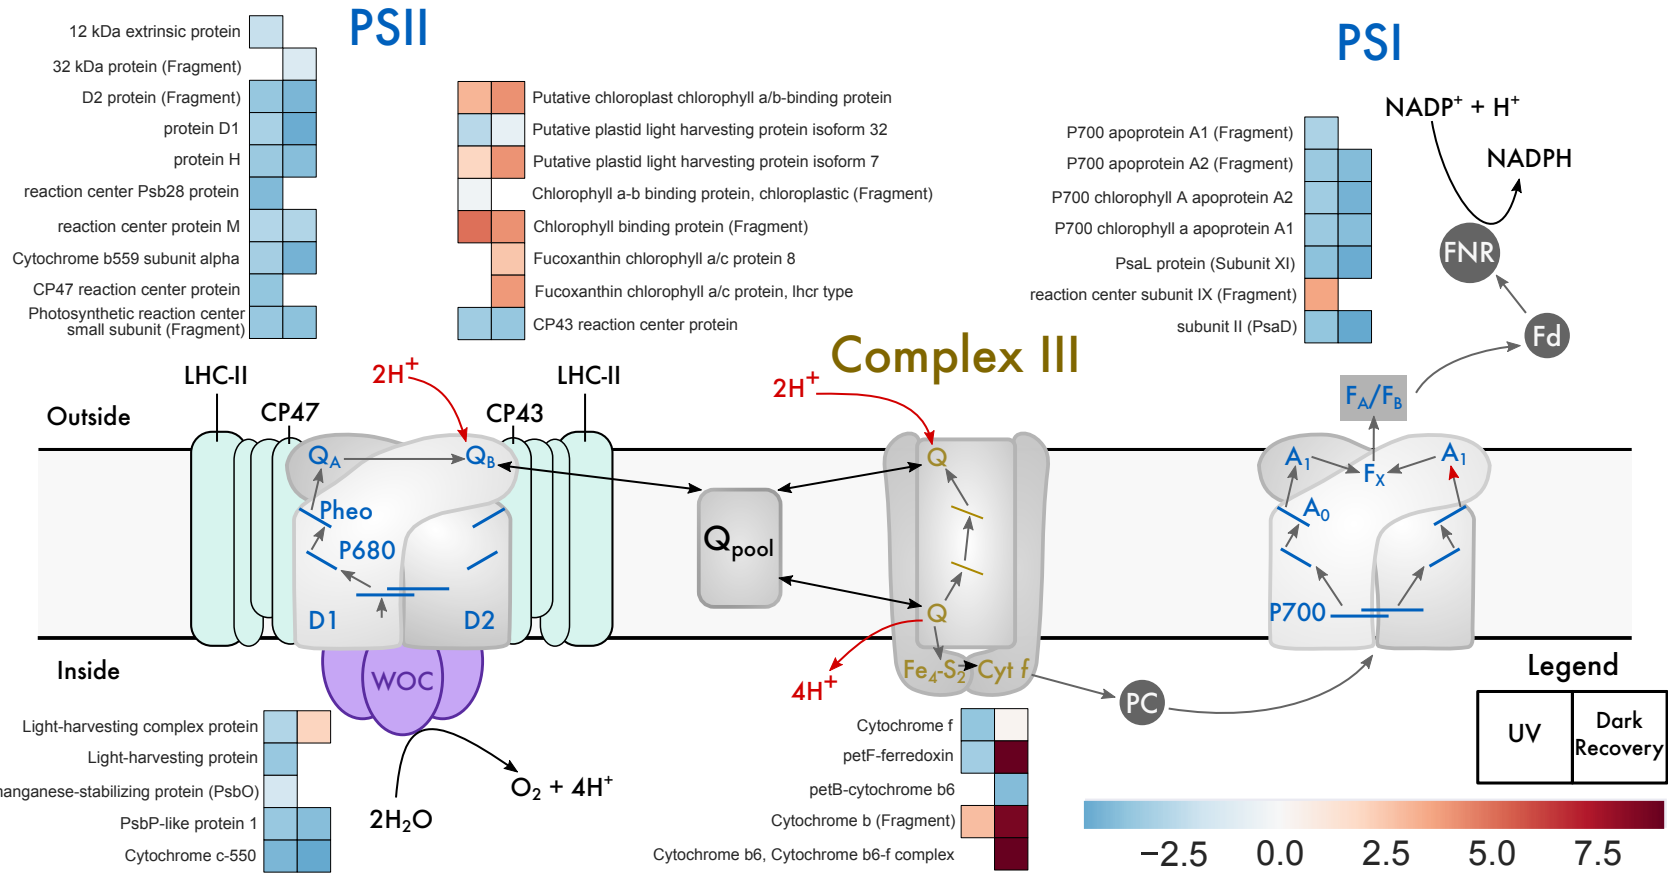

Uniprot Homologs

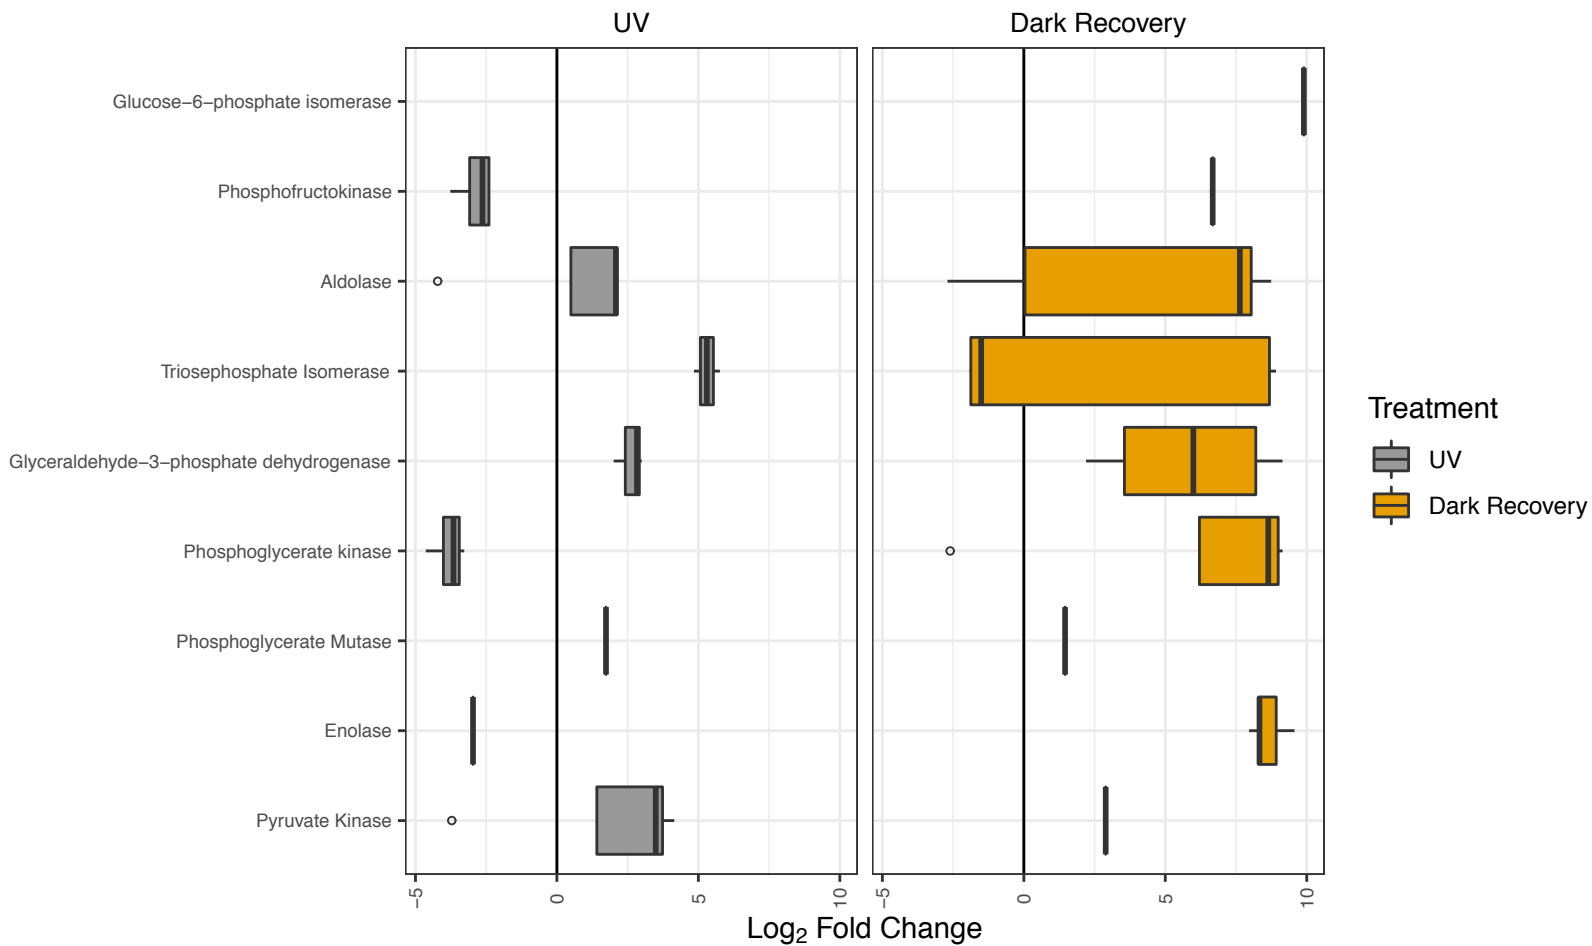

Uniprot Homologs

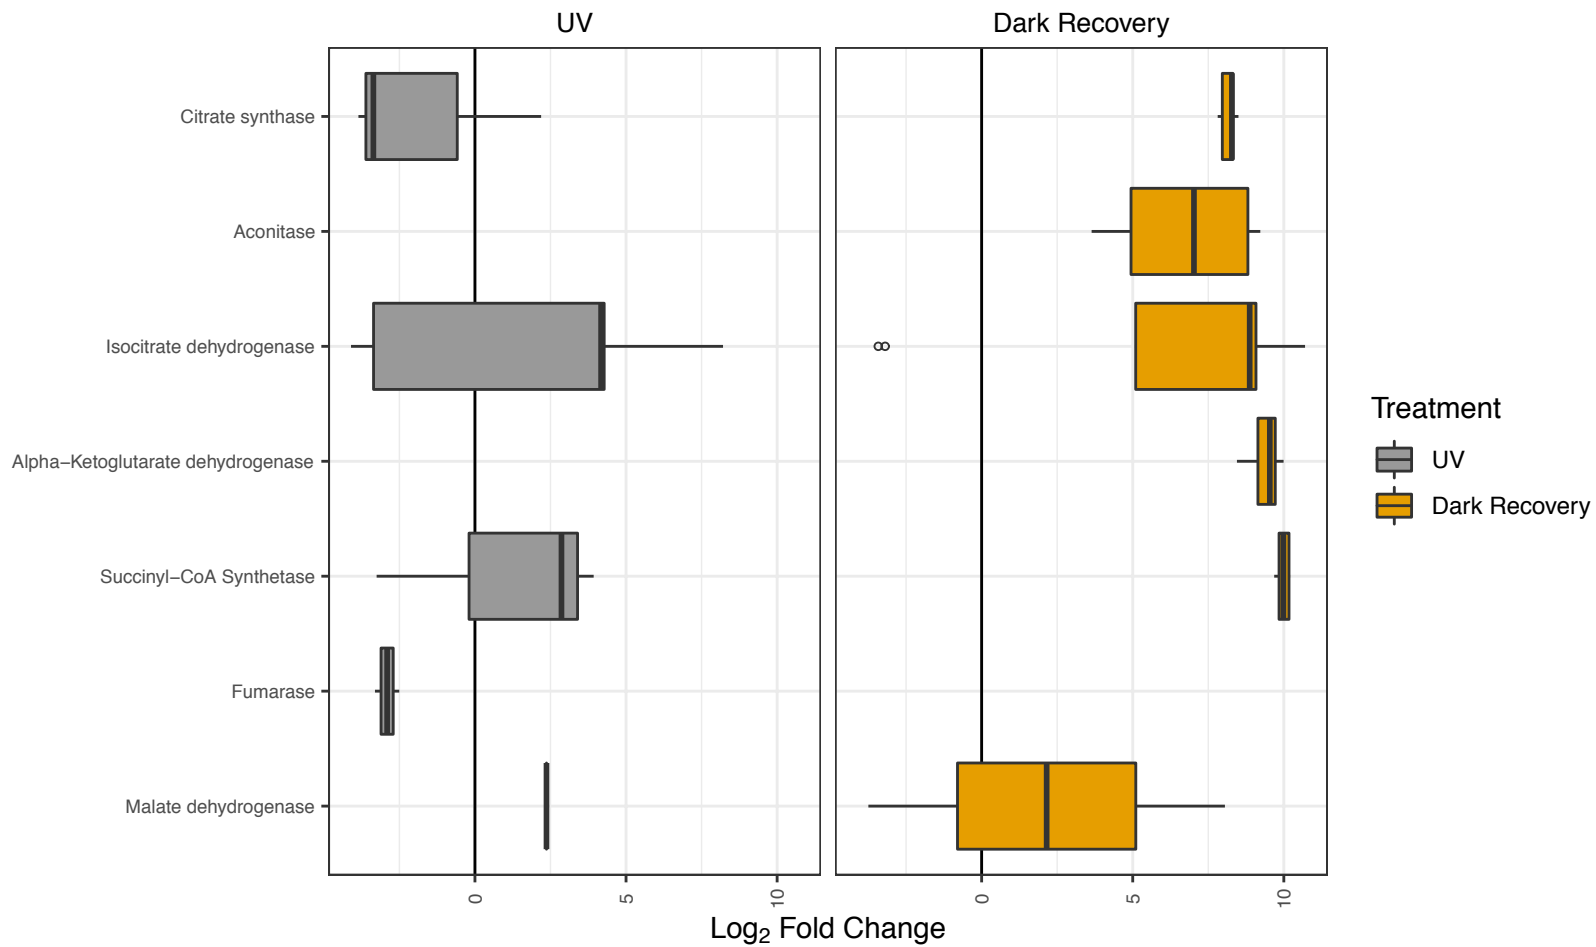

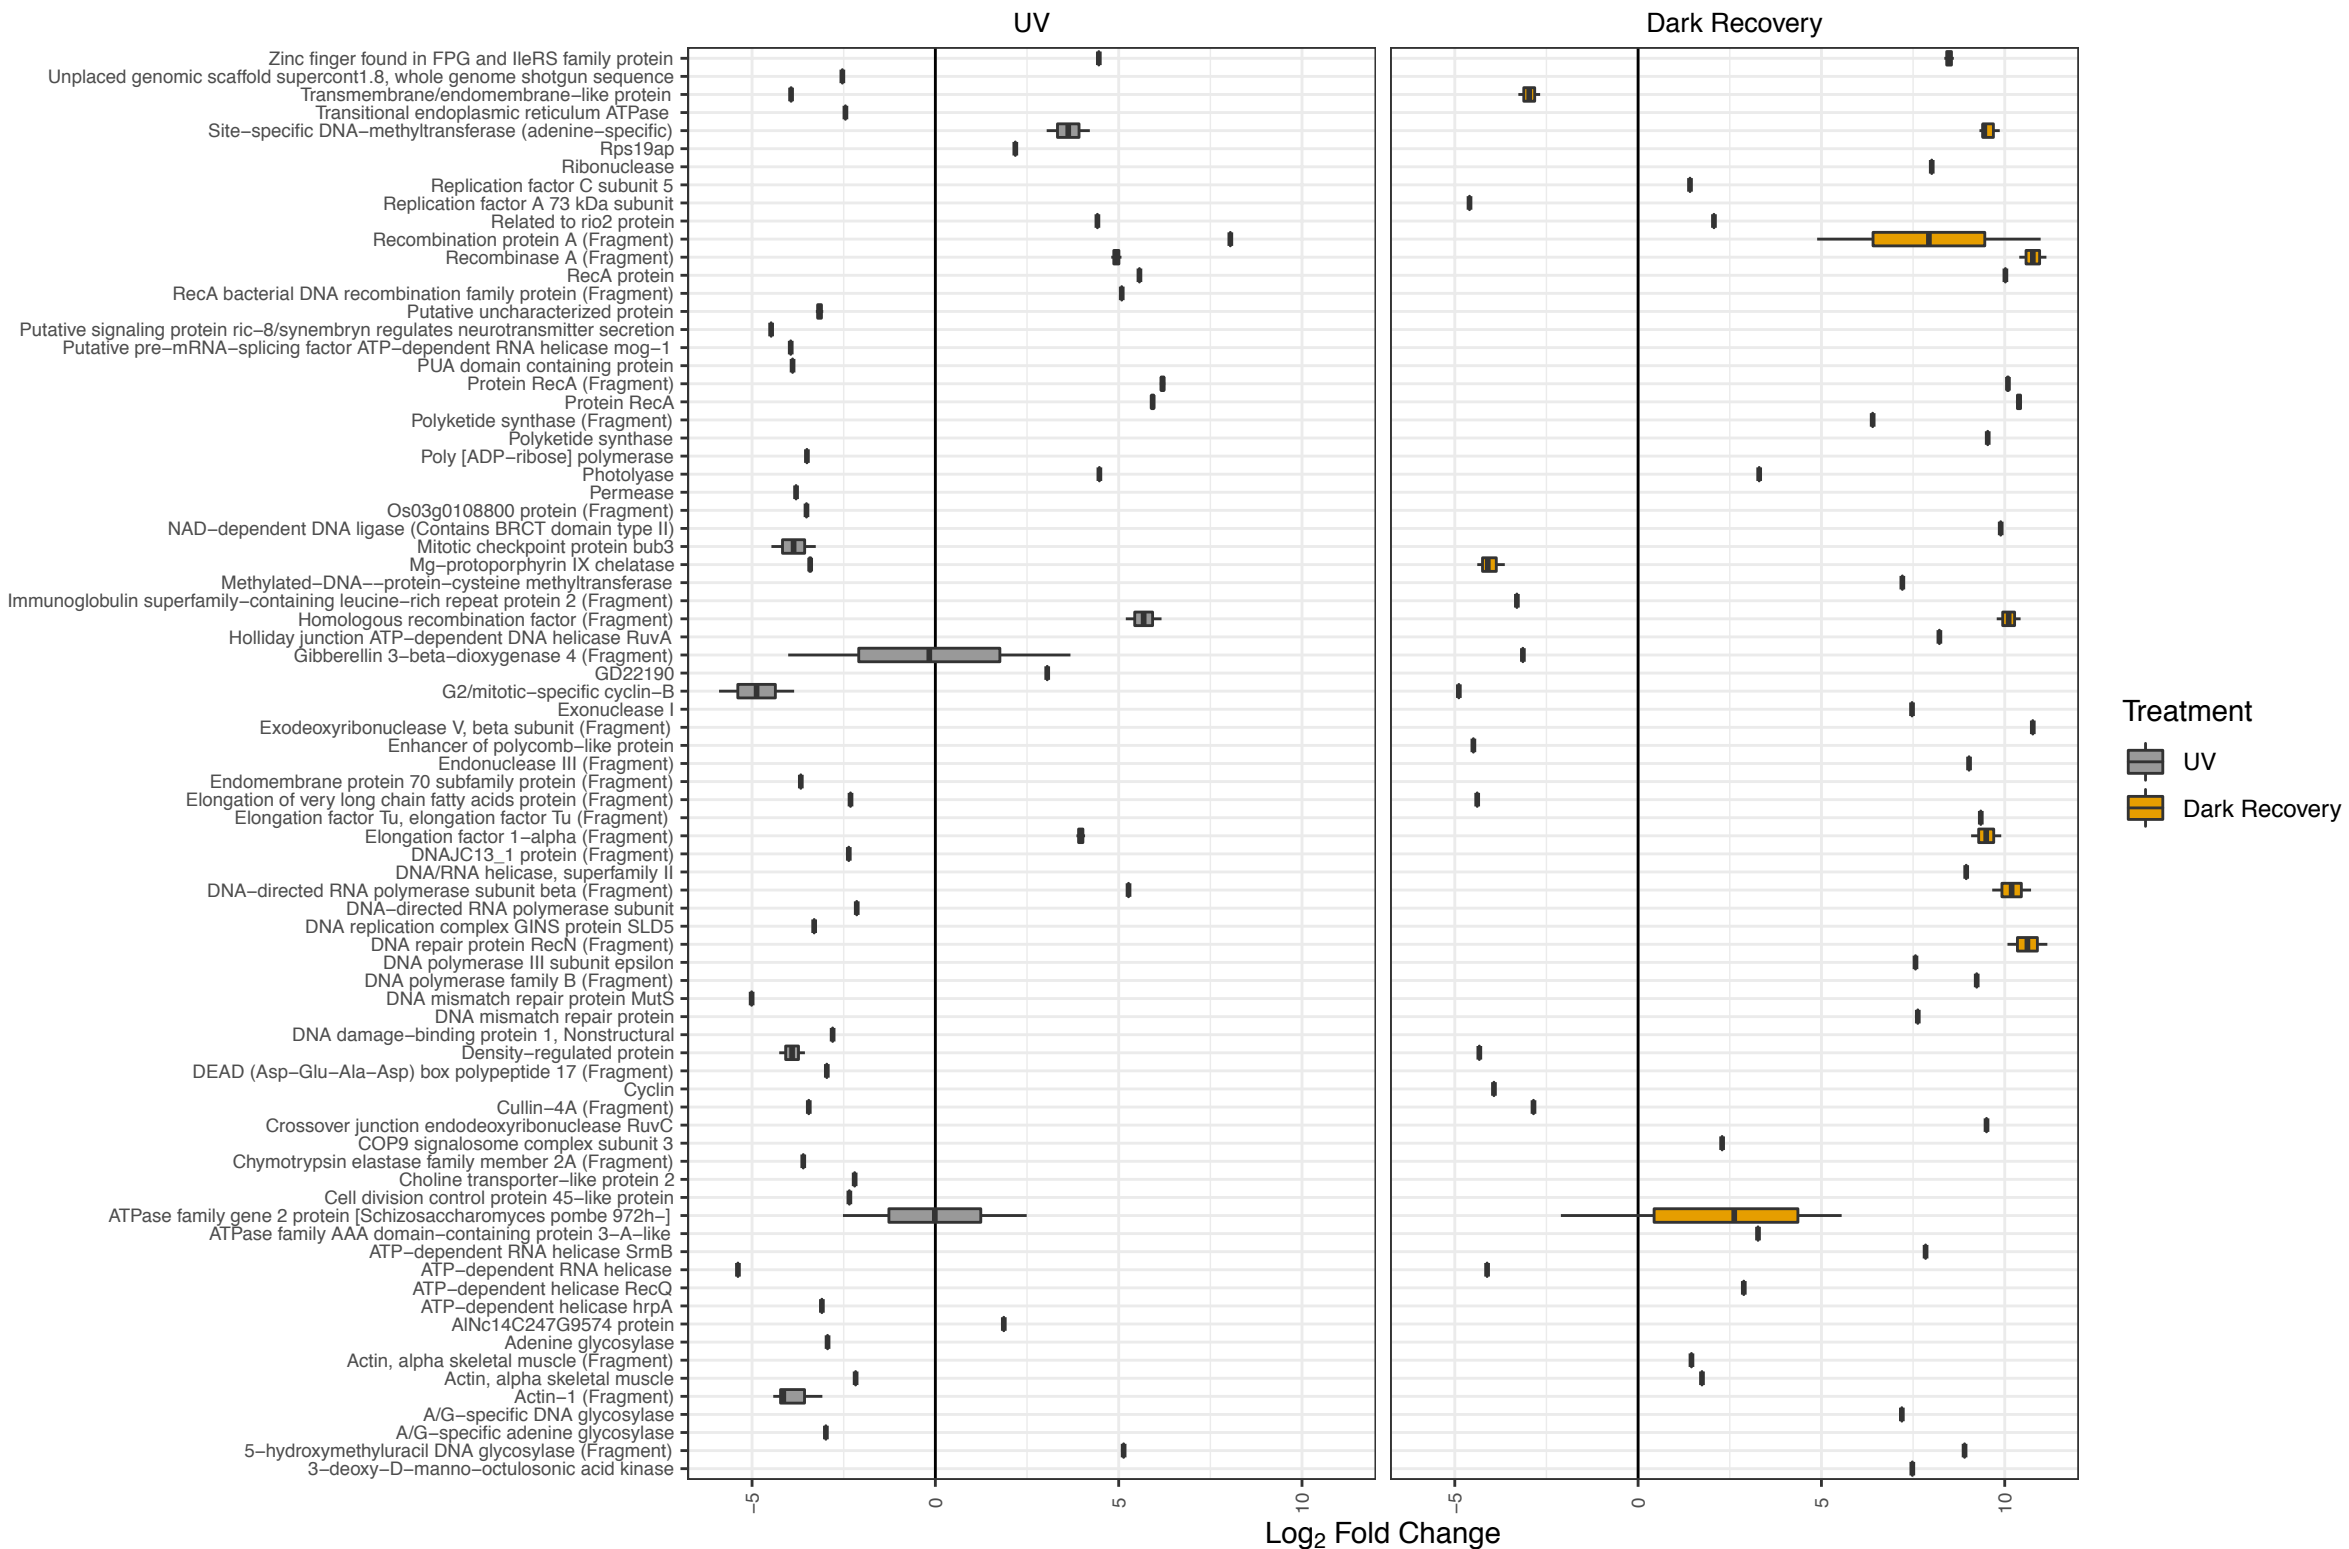

Source: http://biorxiv.org/content/10.1101/252668v2.full.pdf
